# Supplementary material for: 9-Arylacenaphtho[1,2-b]quinoxalines via Suzuki coupling reaction as cancer therapeutic and cellular imaging agents
Source: Royal Society of Chemistry journal article supplement (doi:10.1039/d1nj03915f), 2021-01-01
Supplement: d1nj03915f1.pdf [file d1nj03915f1.pdf]

## Supporting Information

### 9-arylacenaphtho[1,2-b]quinoxalines via Suzuki-Miyaura cross coupling reaction as cancer therapeutic and cellular imaging agent

Lavanya Thilak Babu, Priyankar Paira,\*

---

*Department of Chemistry, School of advanced sciences, Vellore Institute of Technology Vellore-632014, Tamilnadu, India, E-mail: [priyankar.paira@vit.ac.in](mailto:priyankar.paira@vit.ac.in)*

| <b>Index</b>                                   | <b>Page No</b> |
|------------------------------------------------|----------------|
| <b>Characterization</b>                        | <b>2-23</b>    |
| <b>Fig. S1-S3: Cell Viability plot</b>         | <b>24-26</b>   |
| <b>Fig. S4 ATGC titration with compound 5b</b> | <b>27</b>      |

# NMR Spectra

## <sup>1</sup>H NMR of compound 9-bromoacenaphtho[1,2-b]quinoxaline (3):

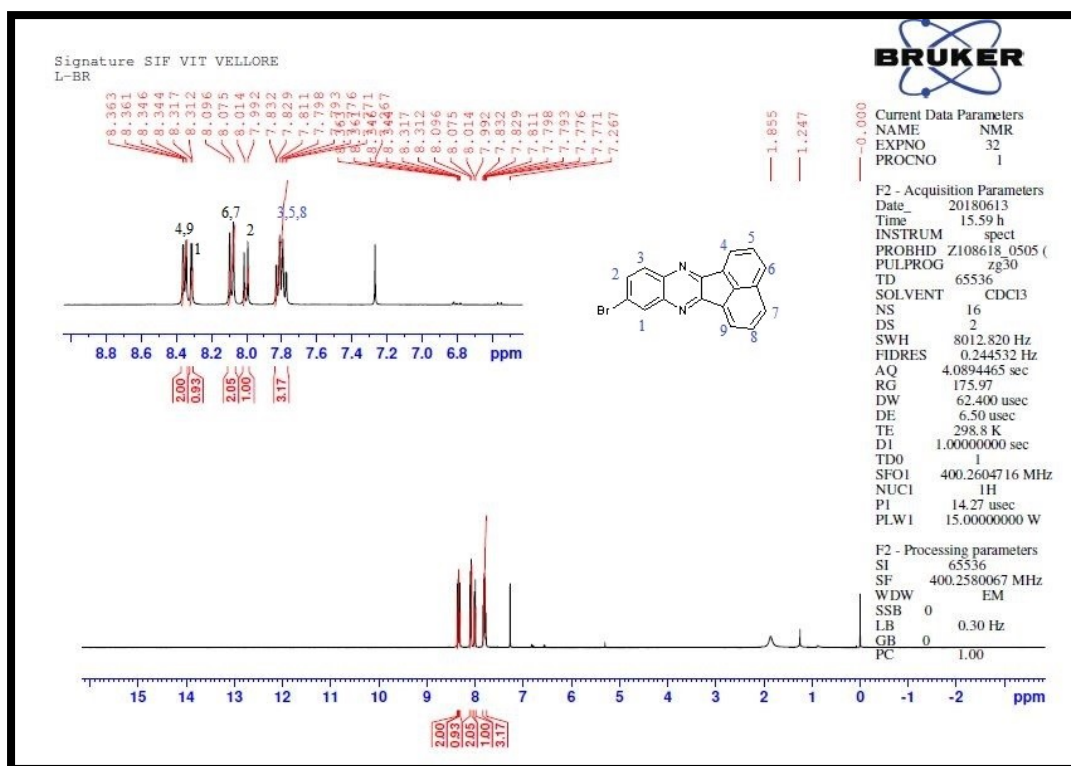

## <sup>13</sup>C NMR of compound 9-bromoacenaphtho[1,2-b]quinoxaline (3):

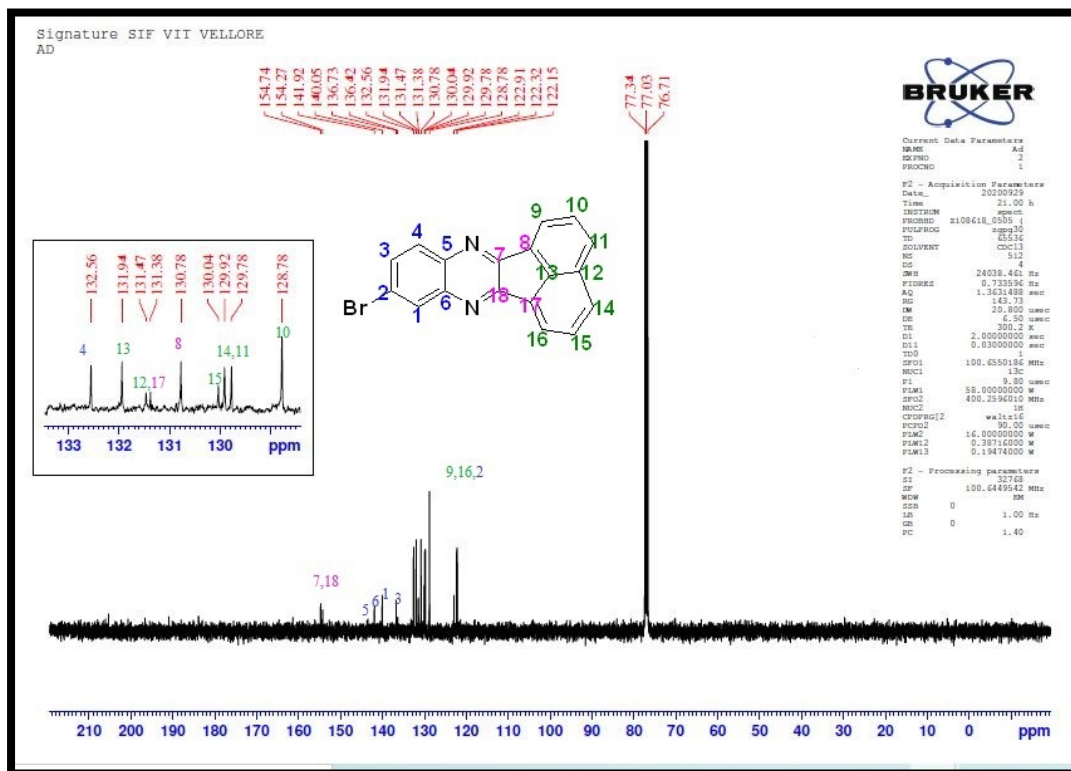

# <sup>1</sup>H NMR of compound 9-phenylacnaphtho[1,2-b]quinoxaline (5a)

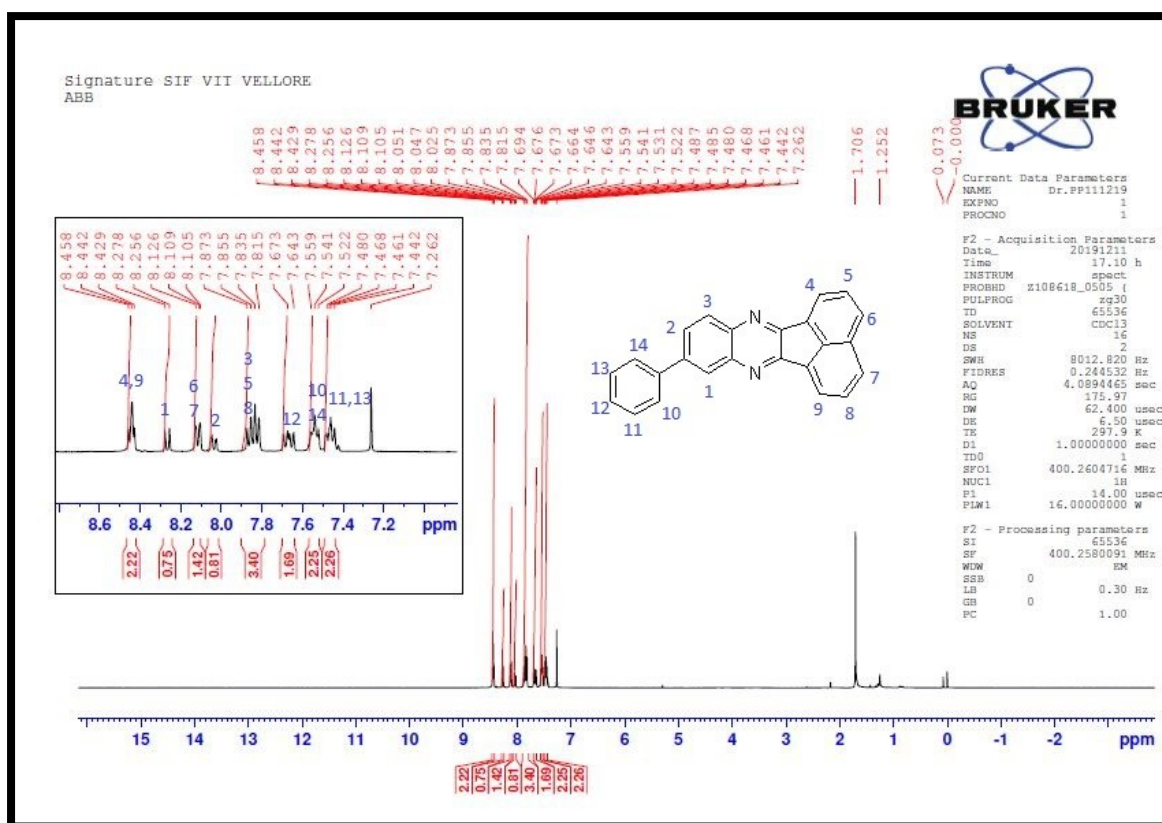

# <sup>13</sup>C NMR of compound of 9-phenylacnaphtho[1,2-b]quinoxaline (5a):

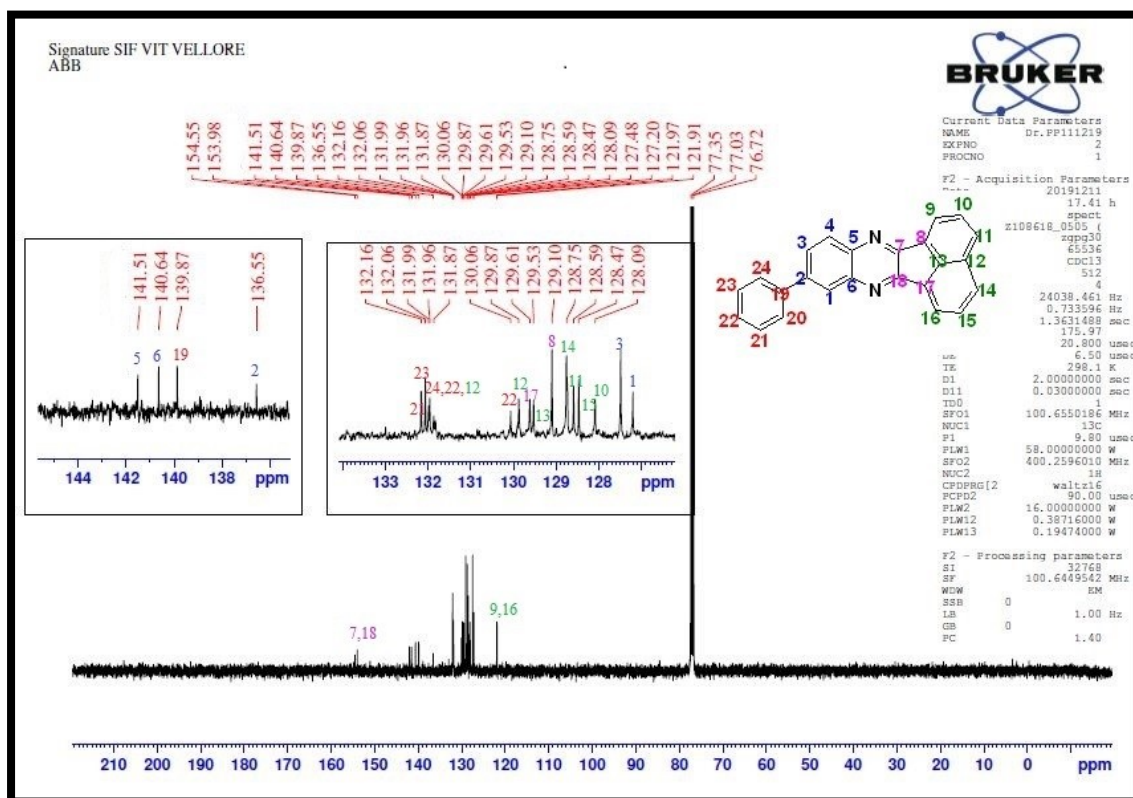

# ESI-MS of compound 9-phenylacenaphtho[1,2-b]quinoxaline (5a)

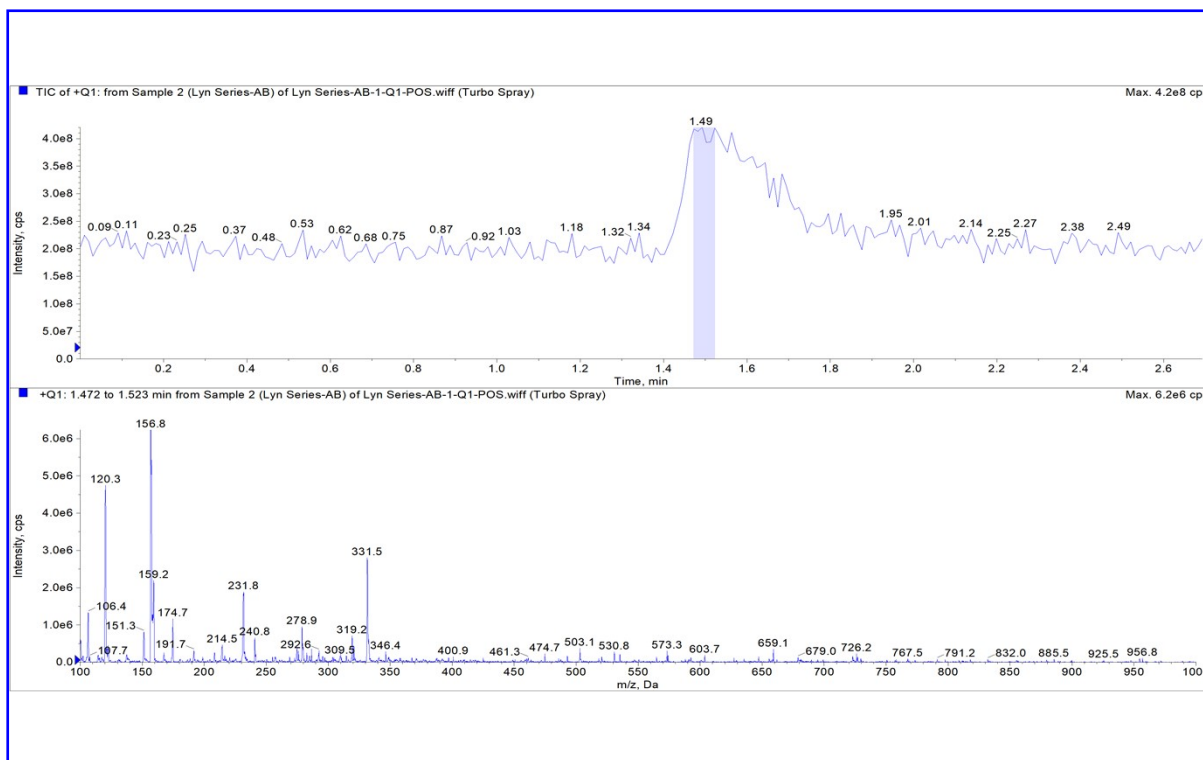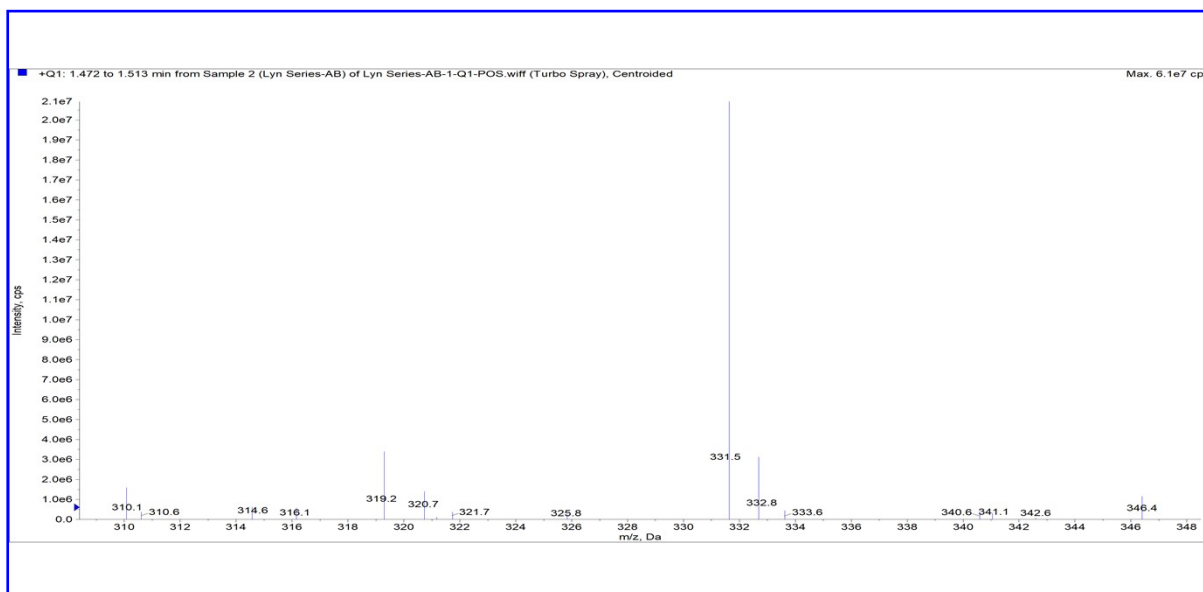

### FT-IR of compound 9-phenylacnaphtho[1,2-b]quinoxaline (5a)

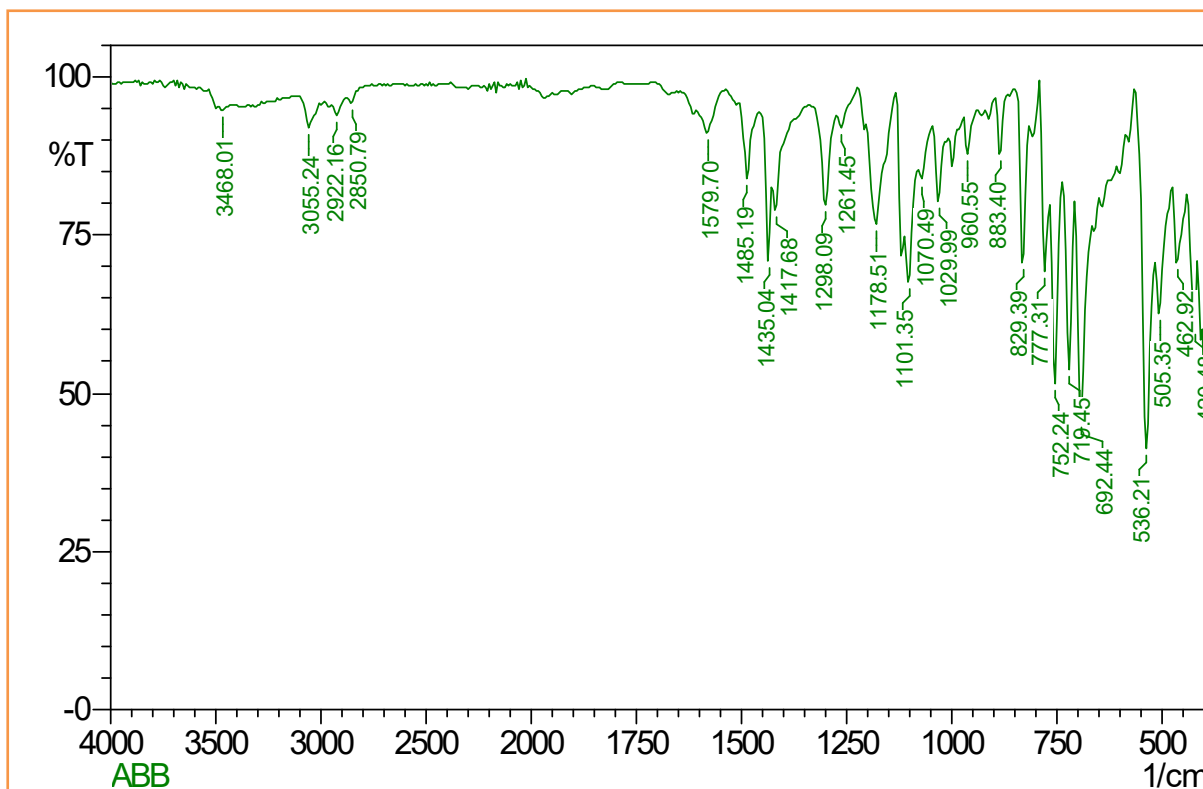

### UPLC purity profile of compound 9-phenylacnaphtho[1,2-b]quinoxaline (5a)

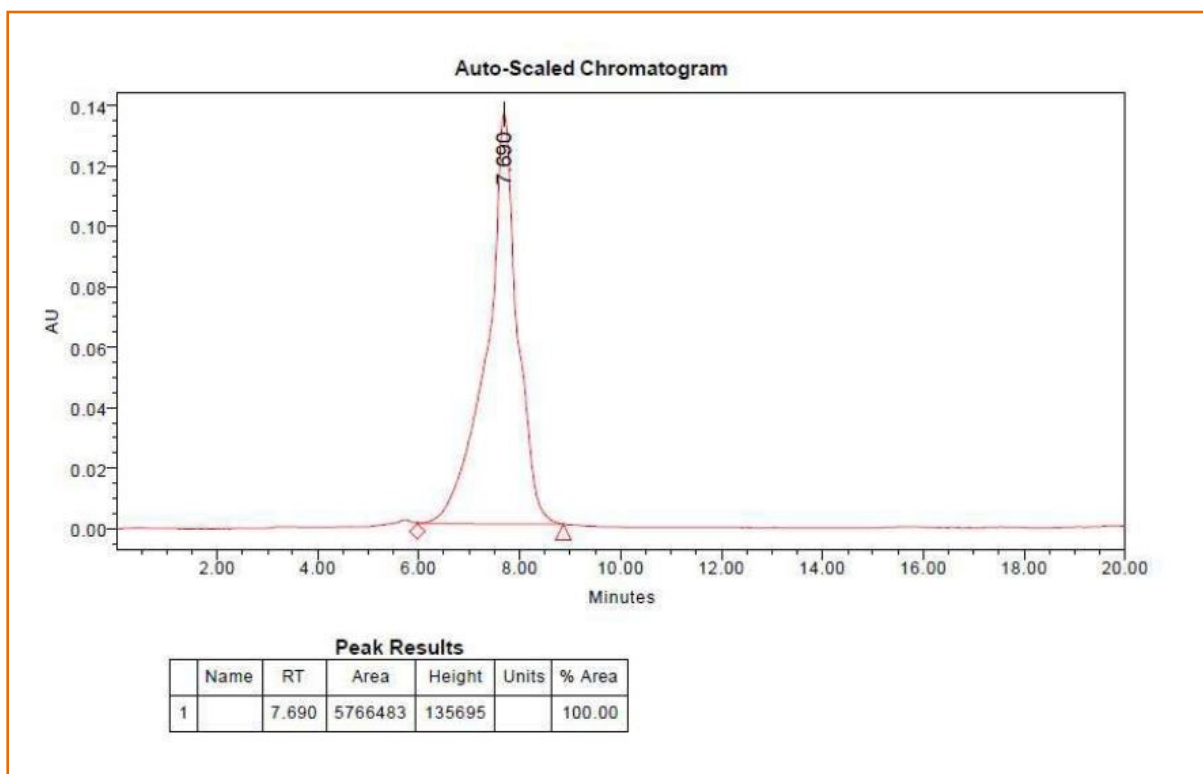

# <sup>1</sup>H NMR of compound 9-(4-fluorophenyl)acenaphtho[1,2-b]quinoxaline (5b)

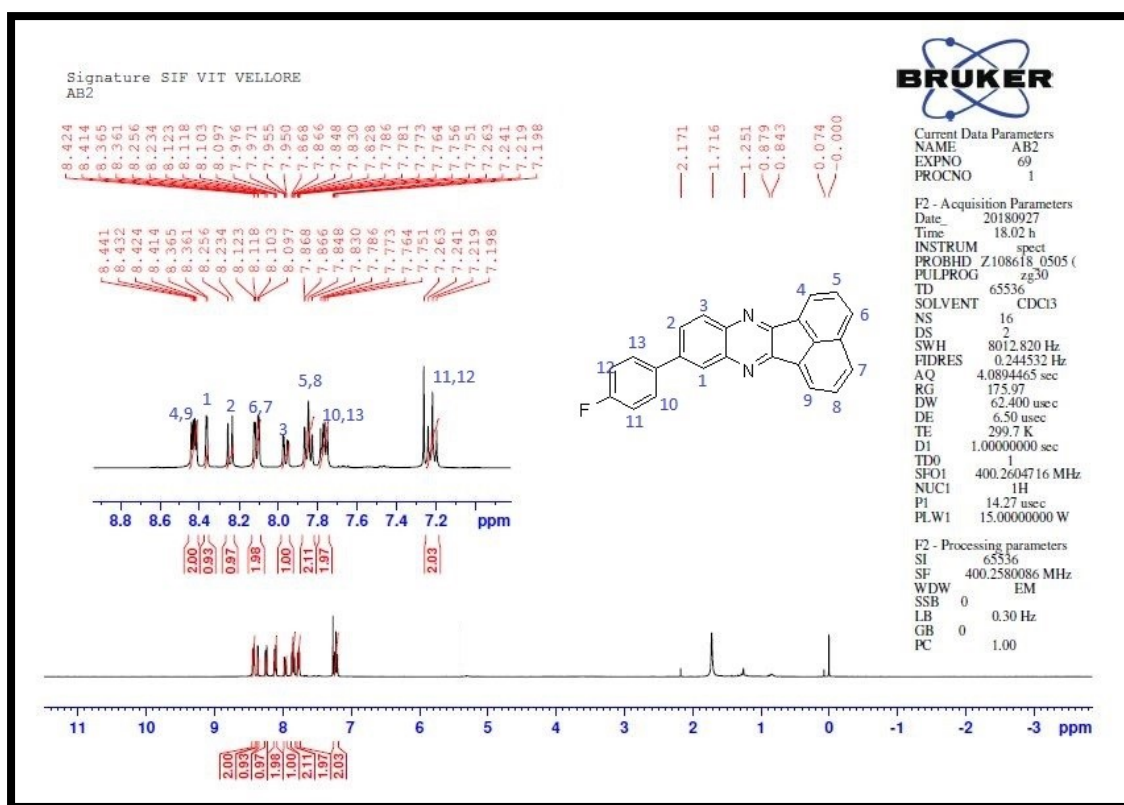

# <sup>13</sup>C NMR spectrum of compound 9-(4-fluorophenyl)acenaphtho[1,2-b]quinoxaline (5b)

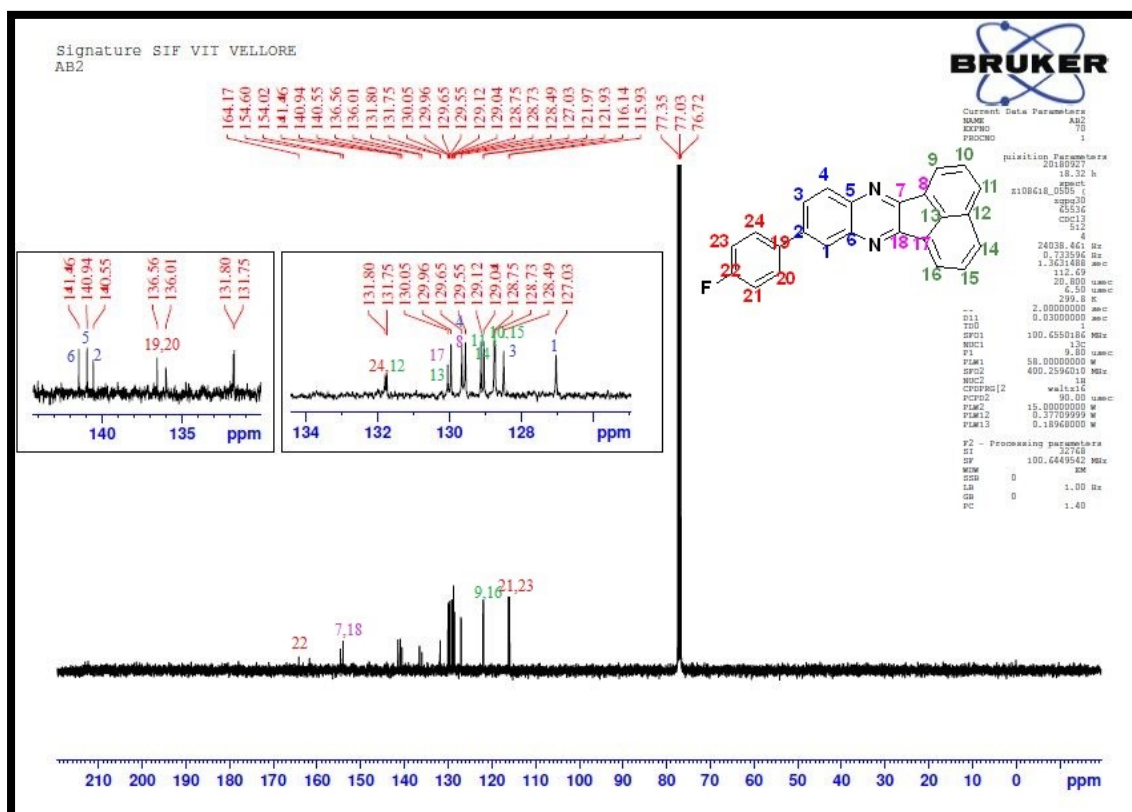

# ESI-MS of compound 9-(4-fluorophenyl)acenaphtho[1,2-b]quinoxaline (5b)

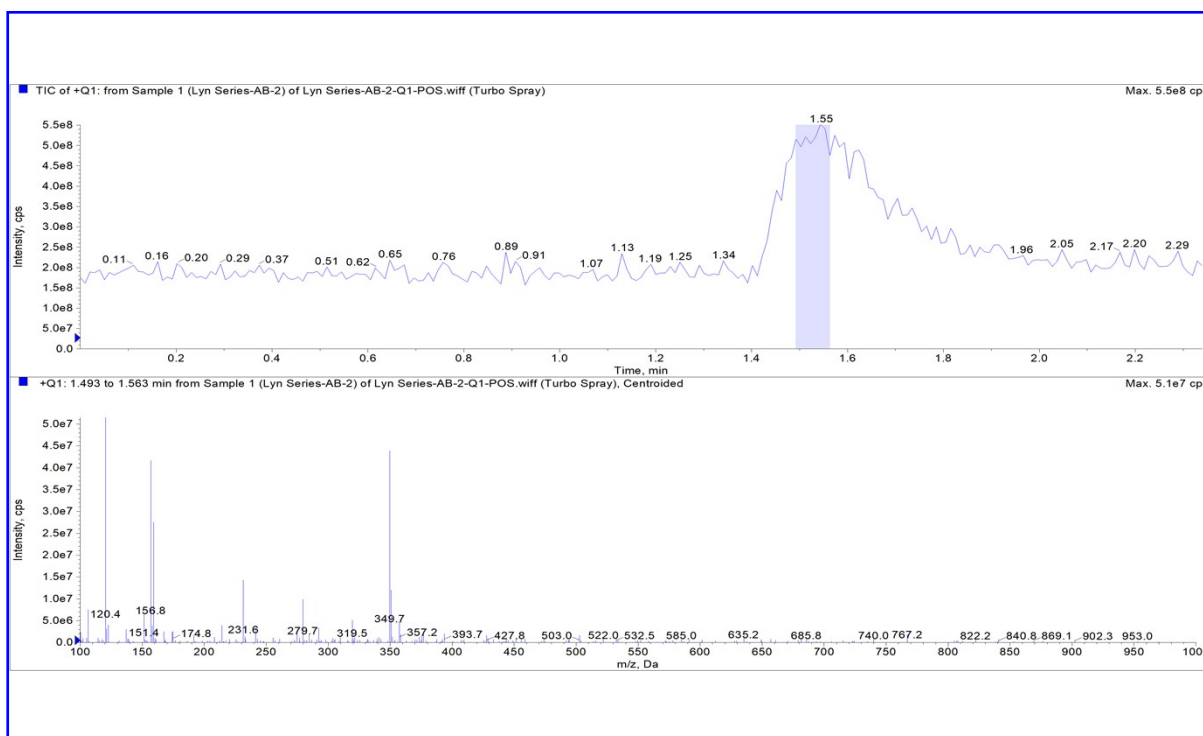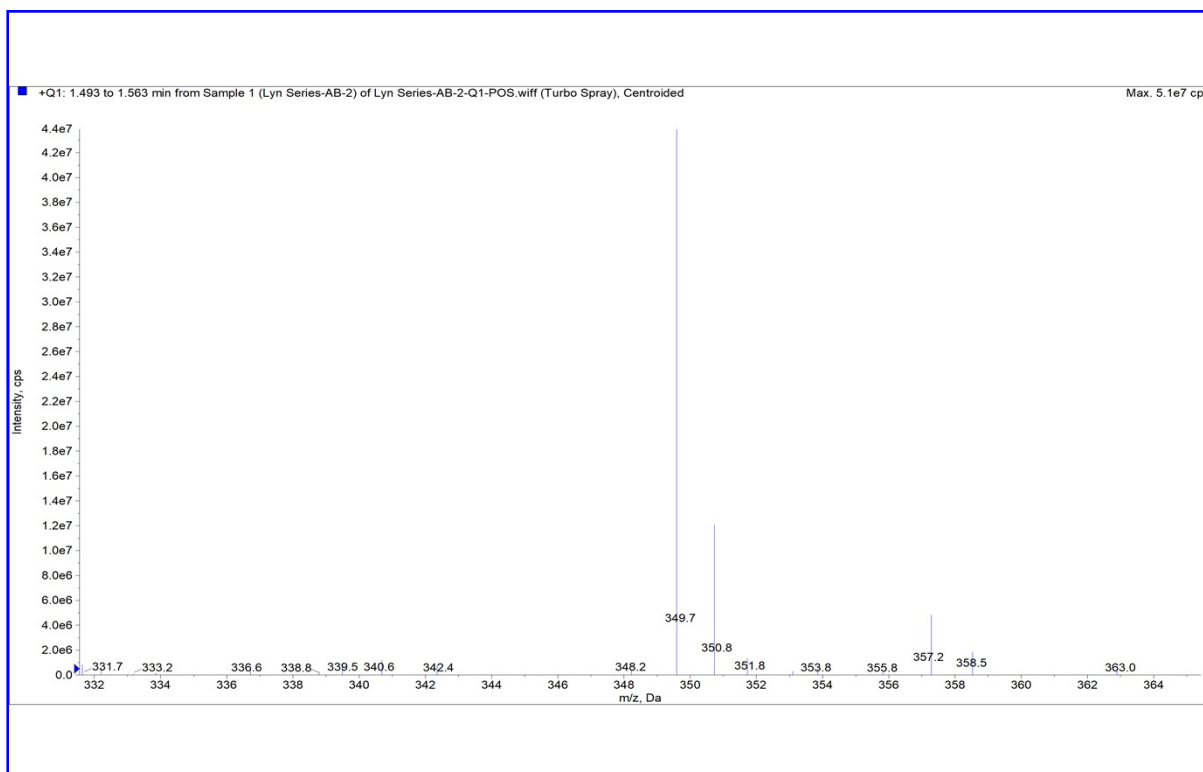

**FTIR of compound 9-(4-fluorophenyl)acenaphtho[1,2-b]quinoxaline (5b)**

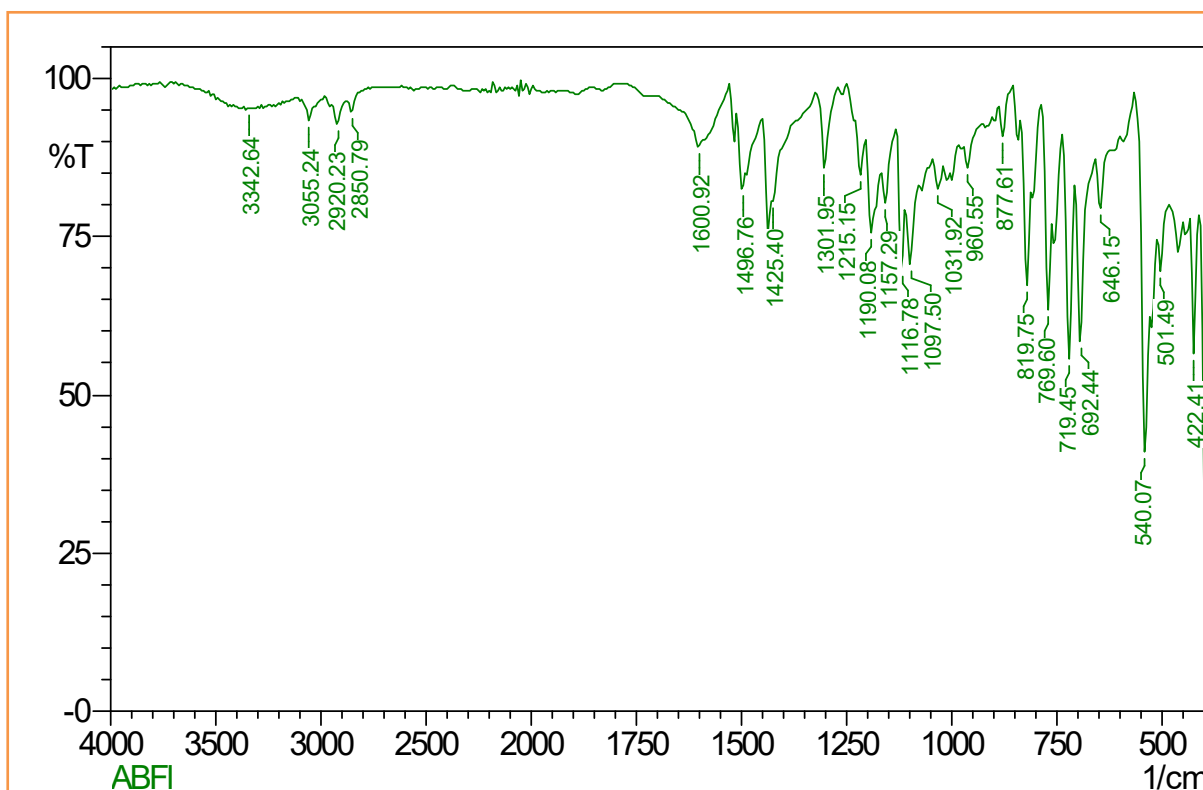

**UPLC purity profile of compound 9-(4-fluorophenyl)acenaphtho[1,2-b]quinoxaline (5b)**

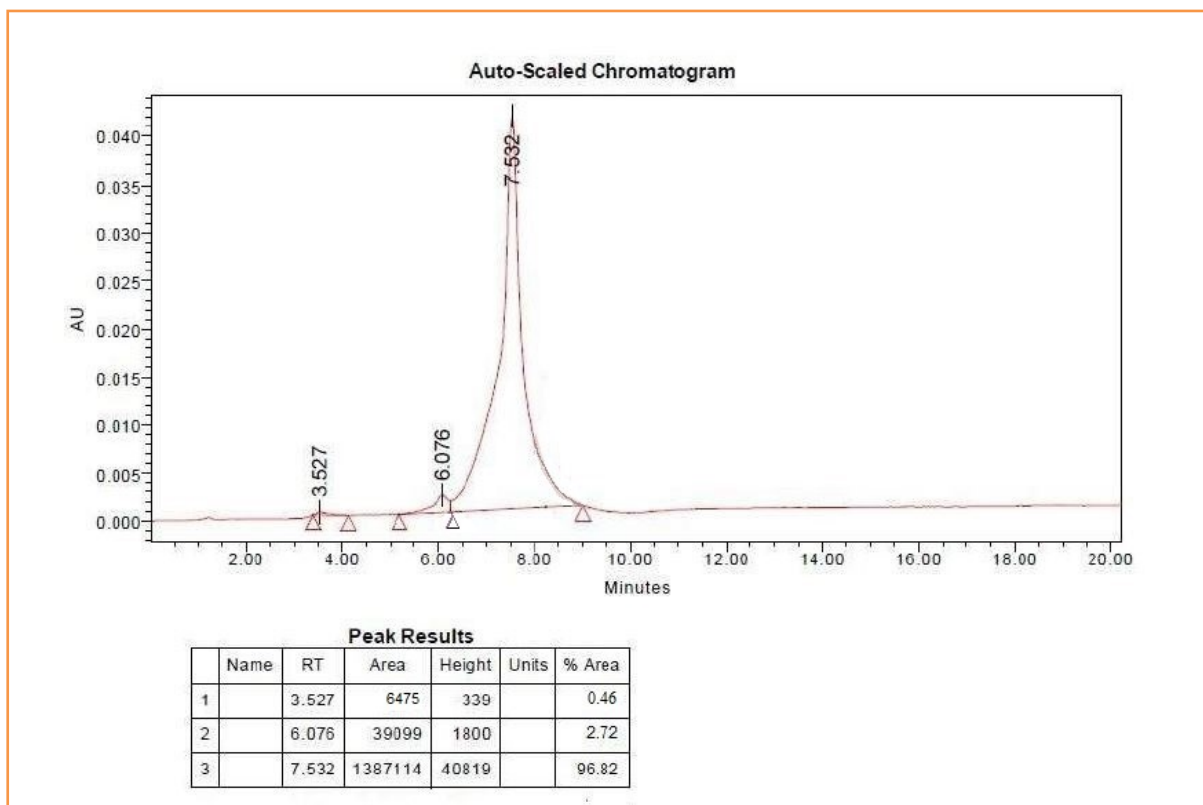



# <sup>1</sup>H NMR of compound 9-(naphthalen-1-yl)acenaphtho[1,2-b]quinoxaline (5c)

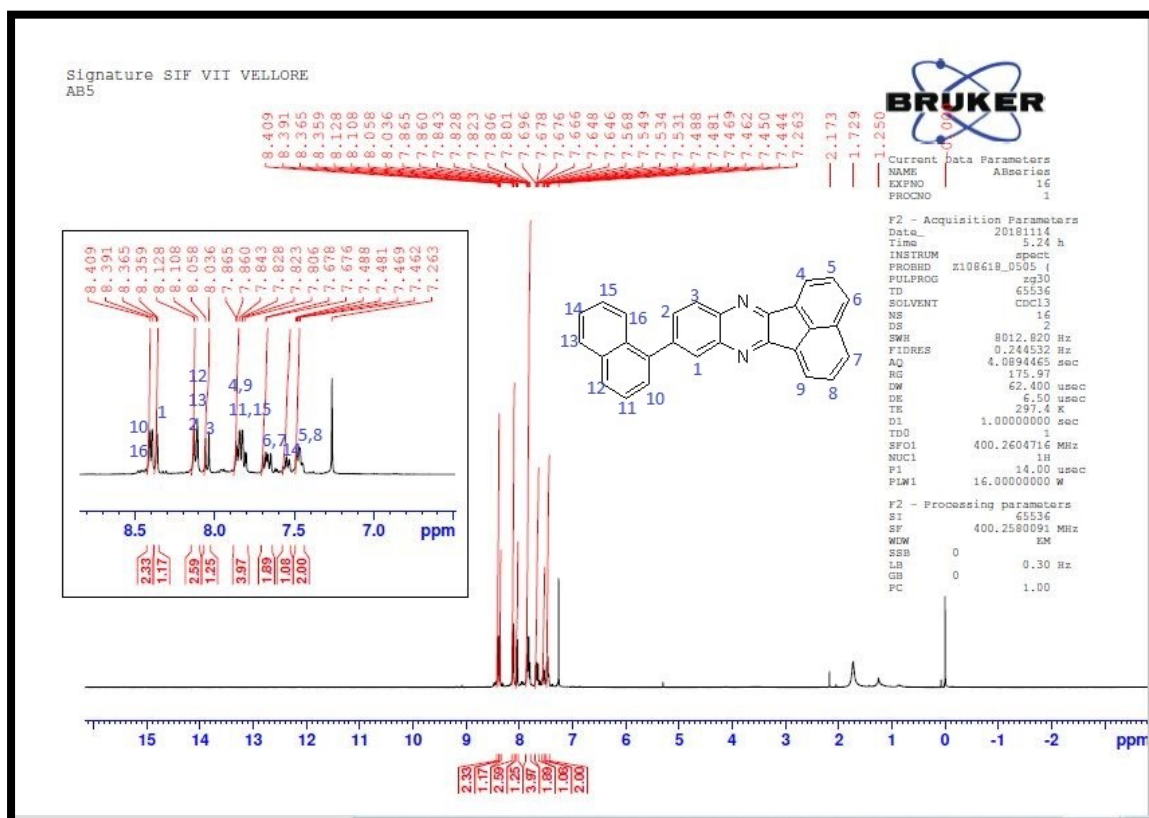

# <sup>13</sup>C NMR spectrum of compound 9-(naphthalen-1-yl)acenaphtho[1,2-b]quinoxaline (5c)

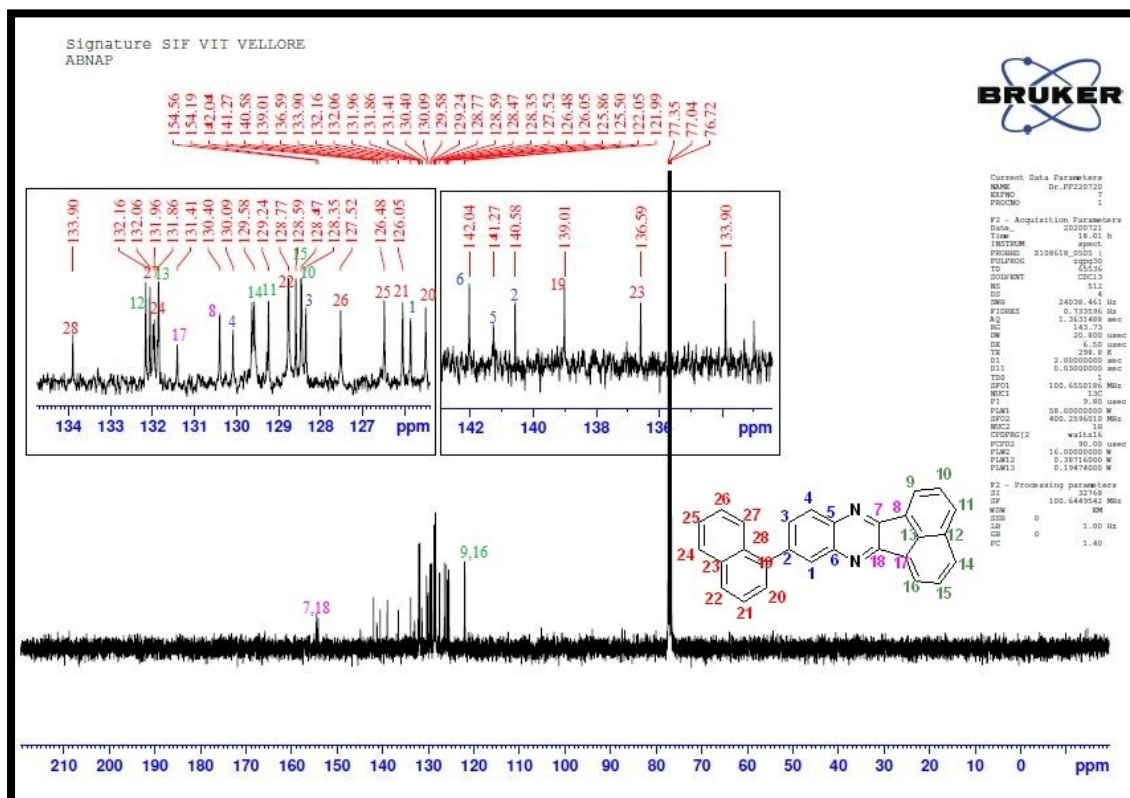

## ESI-MS of compound 9-(naphthalen-1-yl)acenaphtho[1,2-b]quinoxaline (5c)

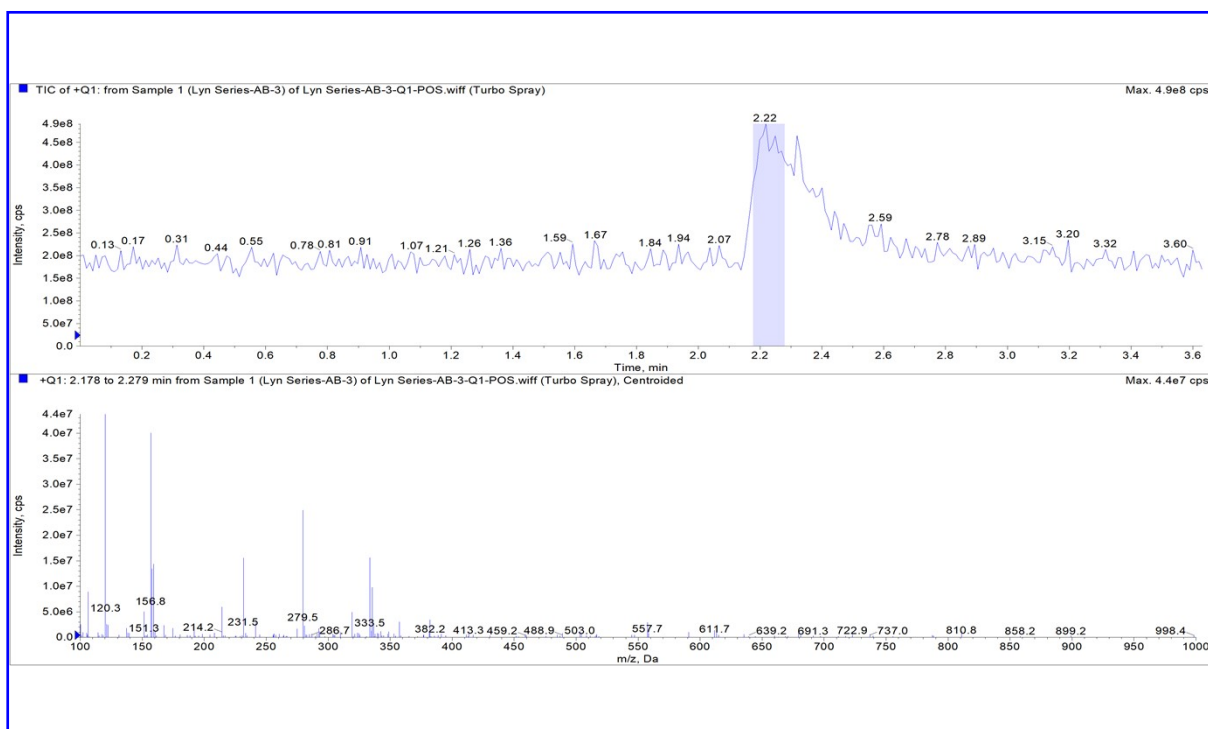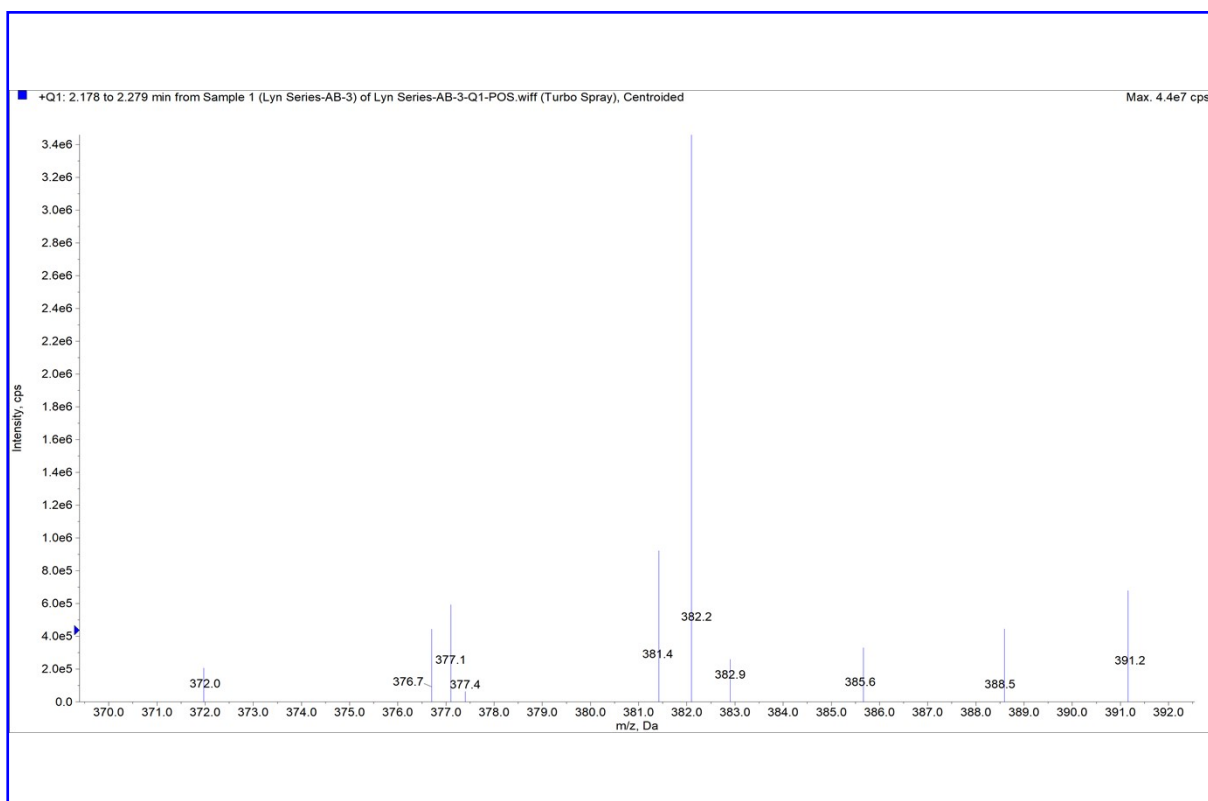

**FTIR of compound 9-(naphthalen-1-yl)acenaphtho[1,2-b]quinoxaline (5c)**

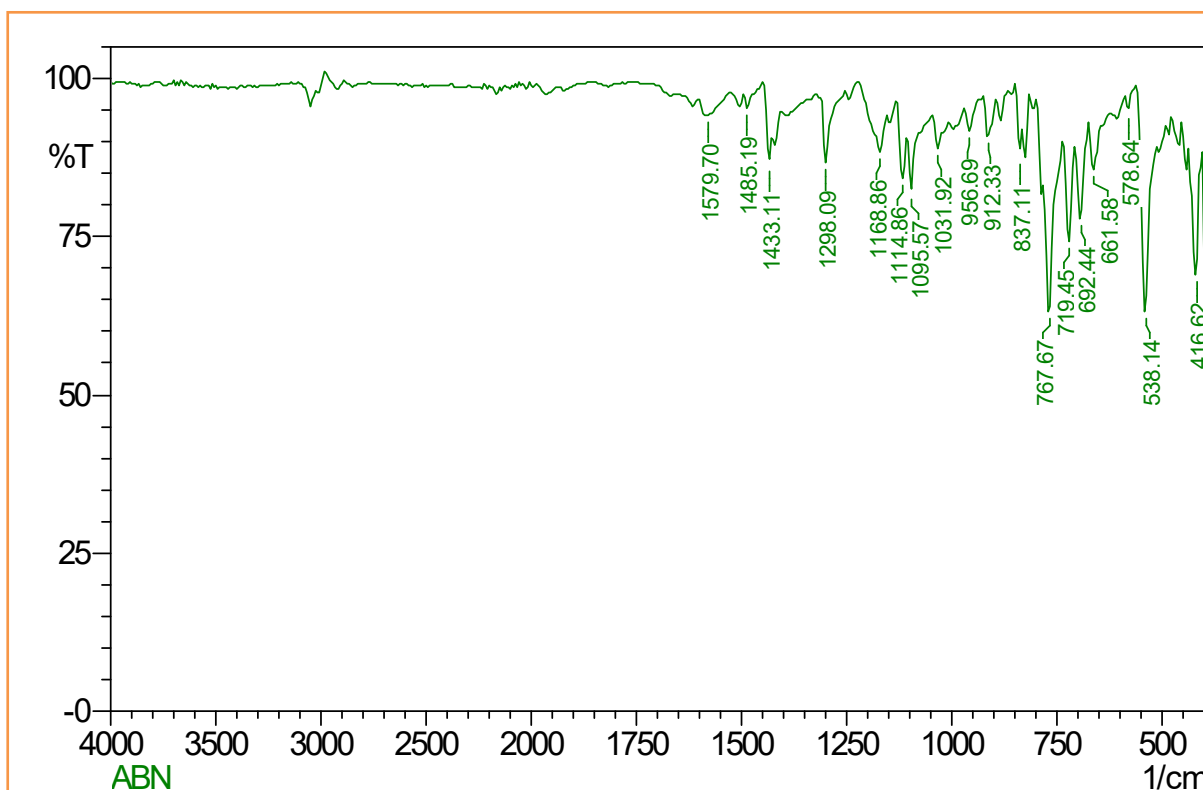

**UPLC purity profile of compound 9-(naphthalen-1-yl)acenaphtho[1,2-b]quinoxaline (5c)**

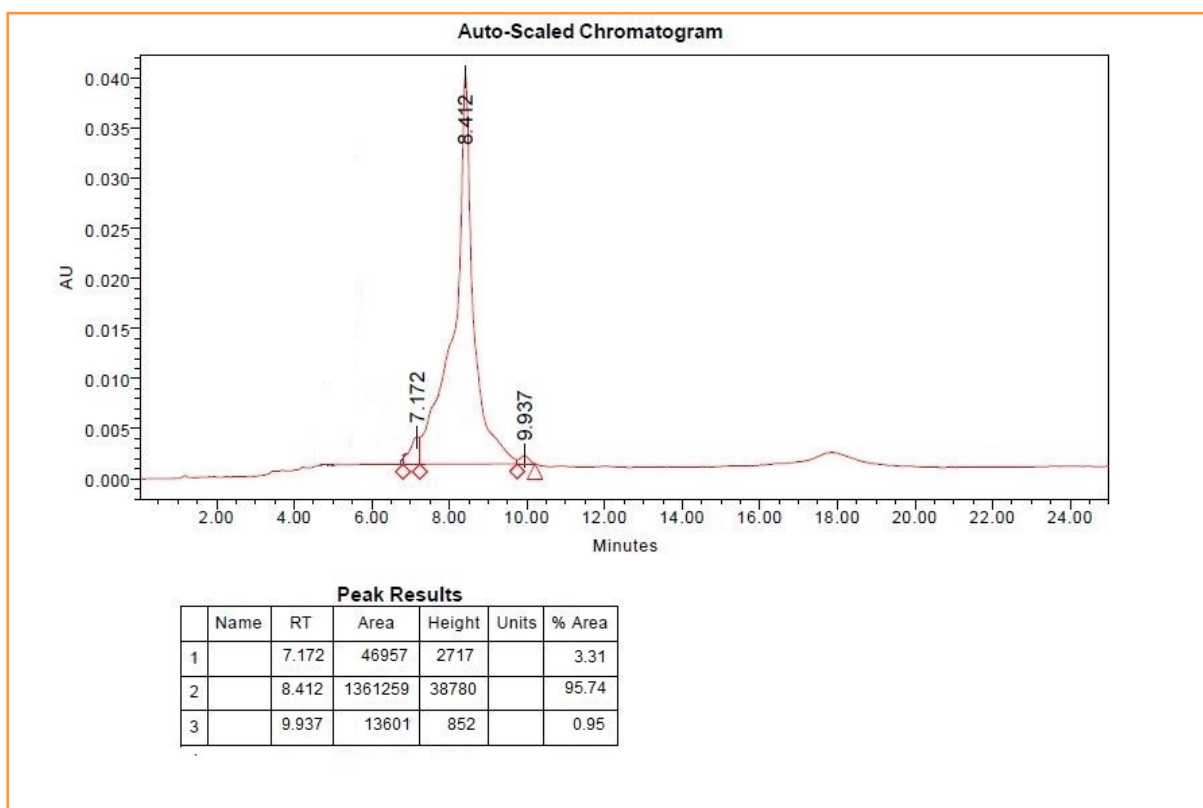

# <sup>1</sup>H NMR of compound 9-(furan-2-yl)acenaphtho[1,2-b]quinoxaline (5d)

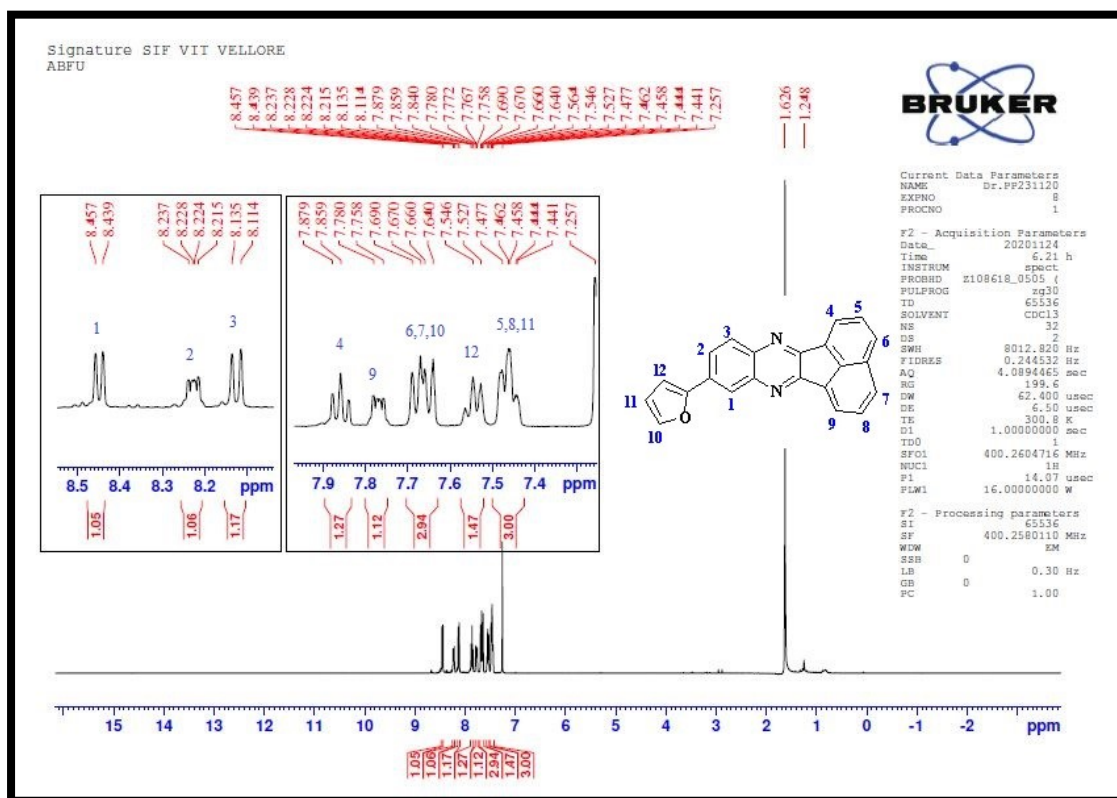

# <sup>13</sup>C NMR of compound 9-(furan-2-yl)acenaphtho[1,2-b]quinoxaline (5d)

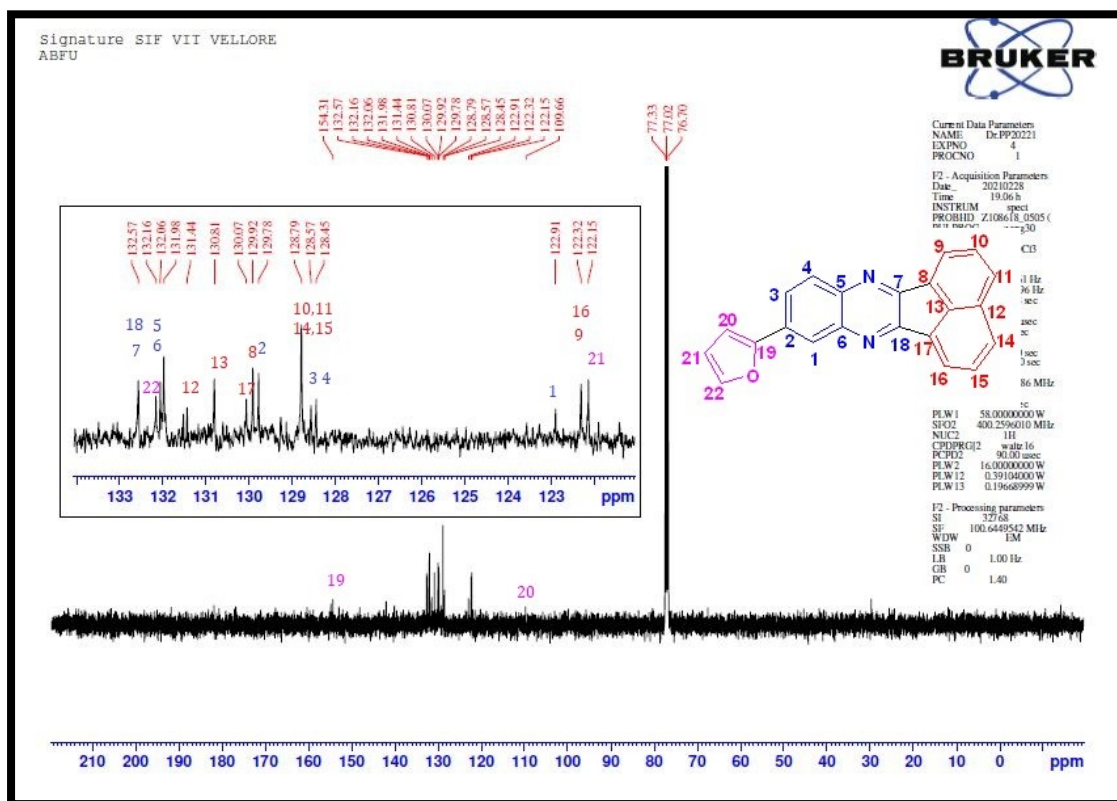

# ESI-MS of compound 9-(furan-2-yl)acenaphtho[1,2-b]quinoxaline (5d)

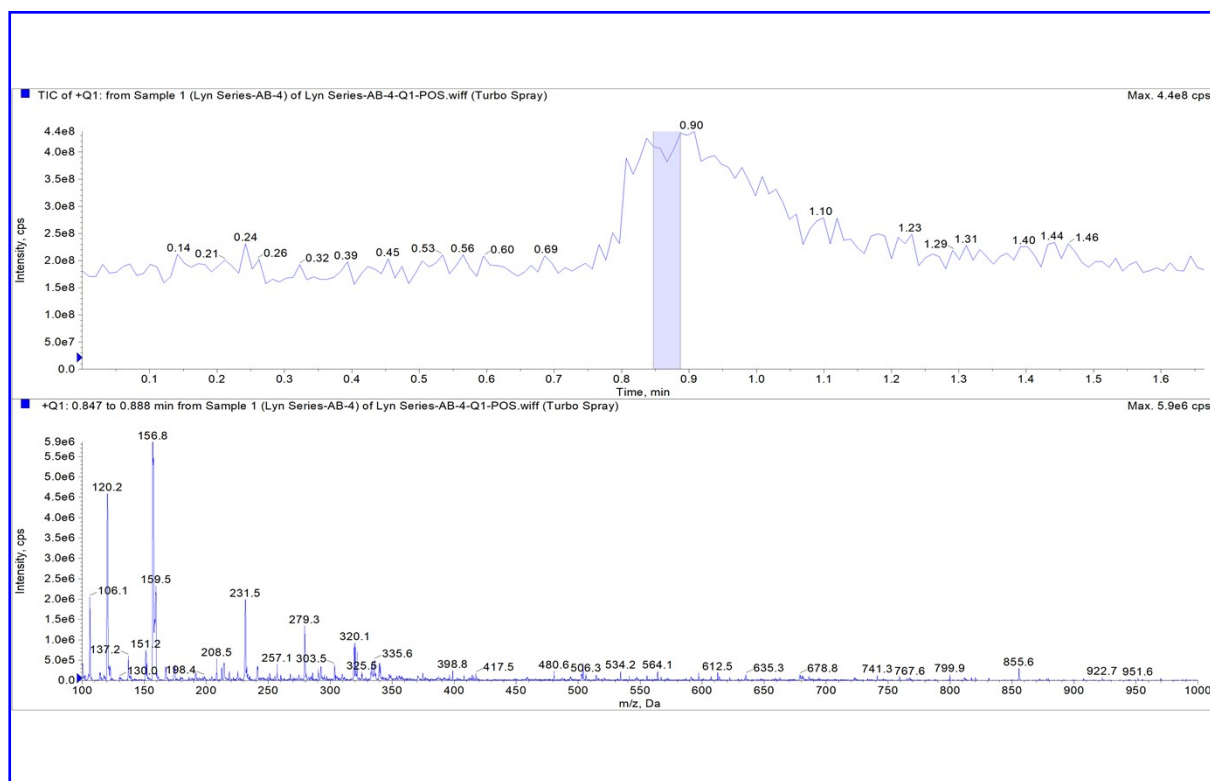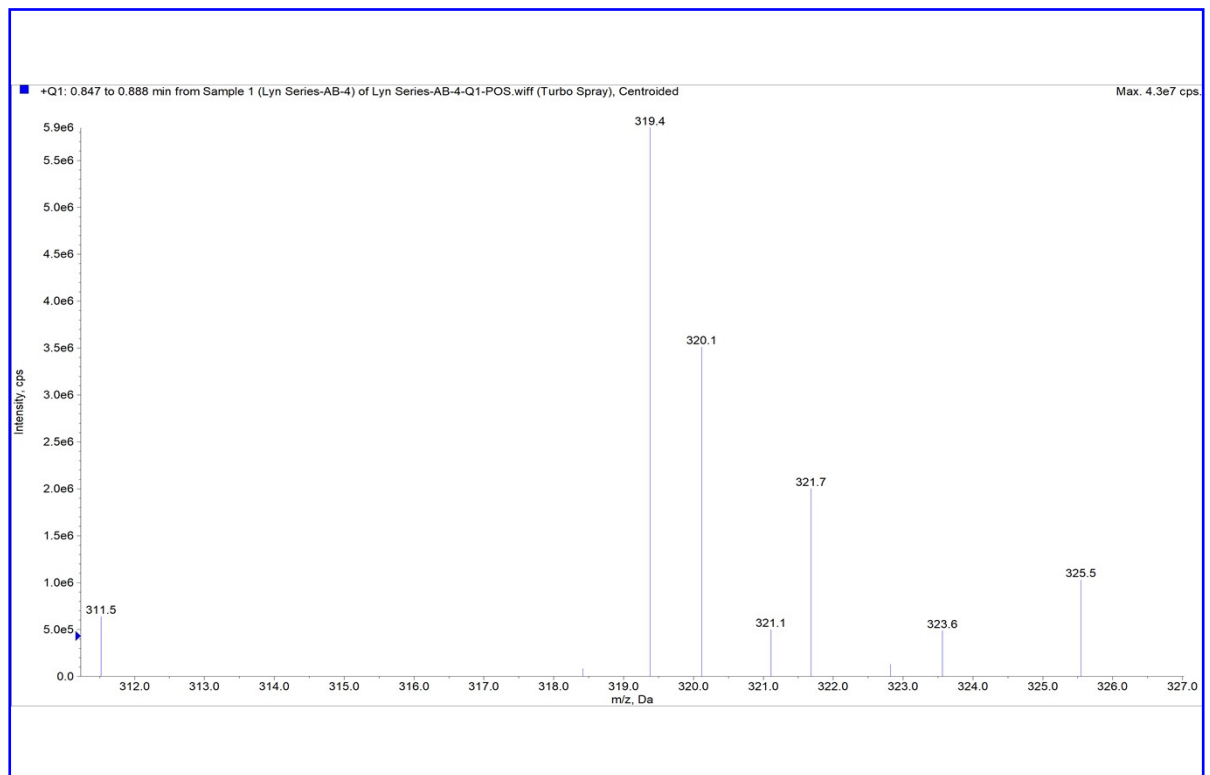

### FTIR of compound 9-(furan-2-yl)acenaphtho[1,2-b]quinoxaline (5d)

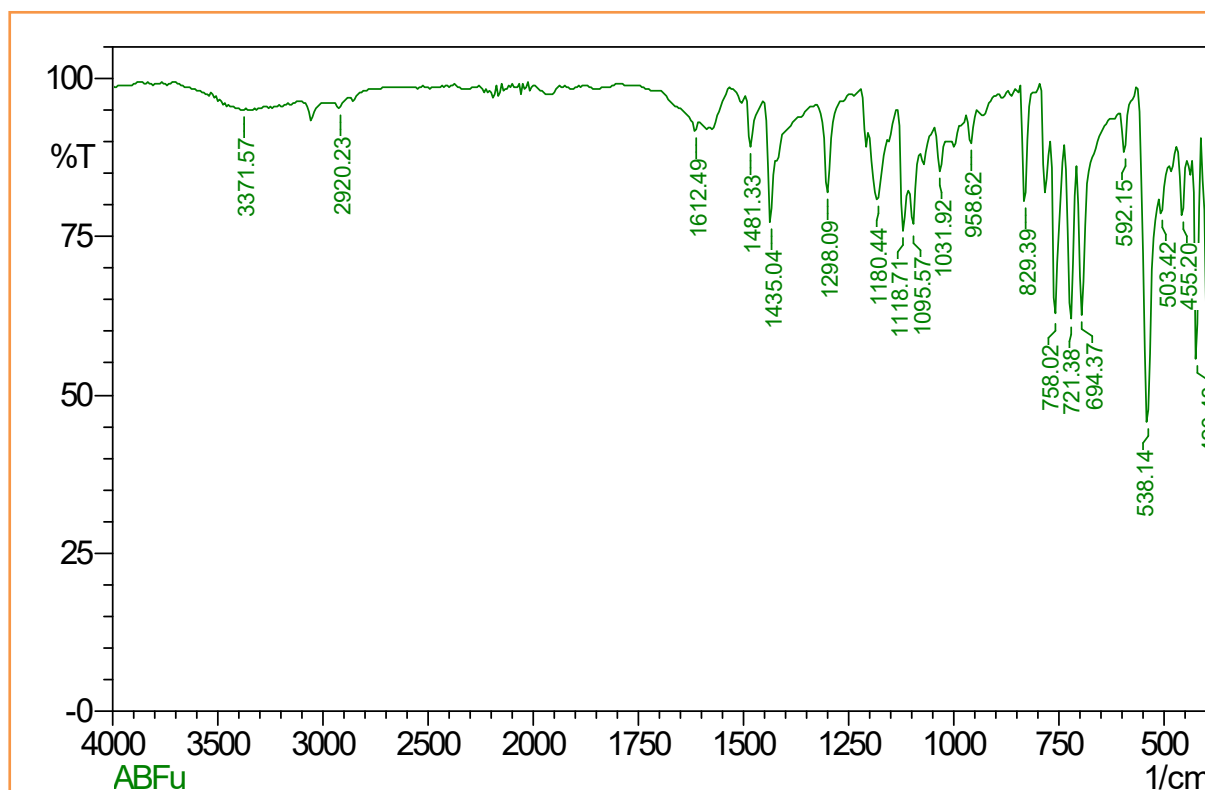

### UPLC purity profile of compound 9-(furan-2-yl)acenaphtho[1,2-b]quinoxaline (5d)

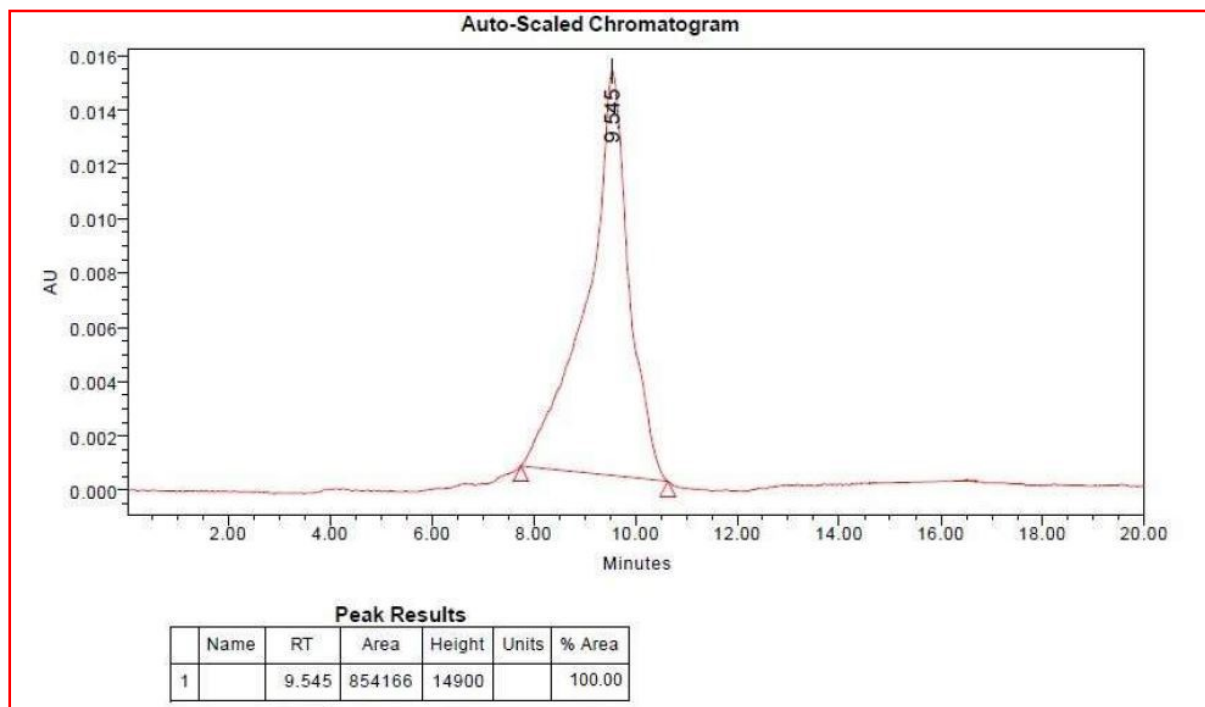



# ESI-MS of compound 9-(4-methoxyphenyl)acenaphtho[1,2-b]quinoxaline (5e)

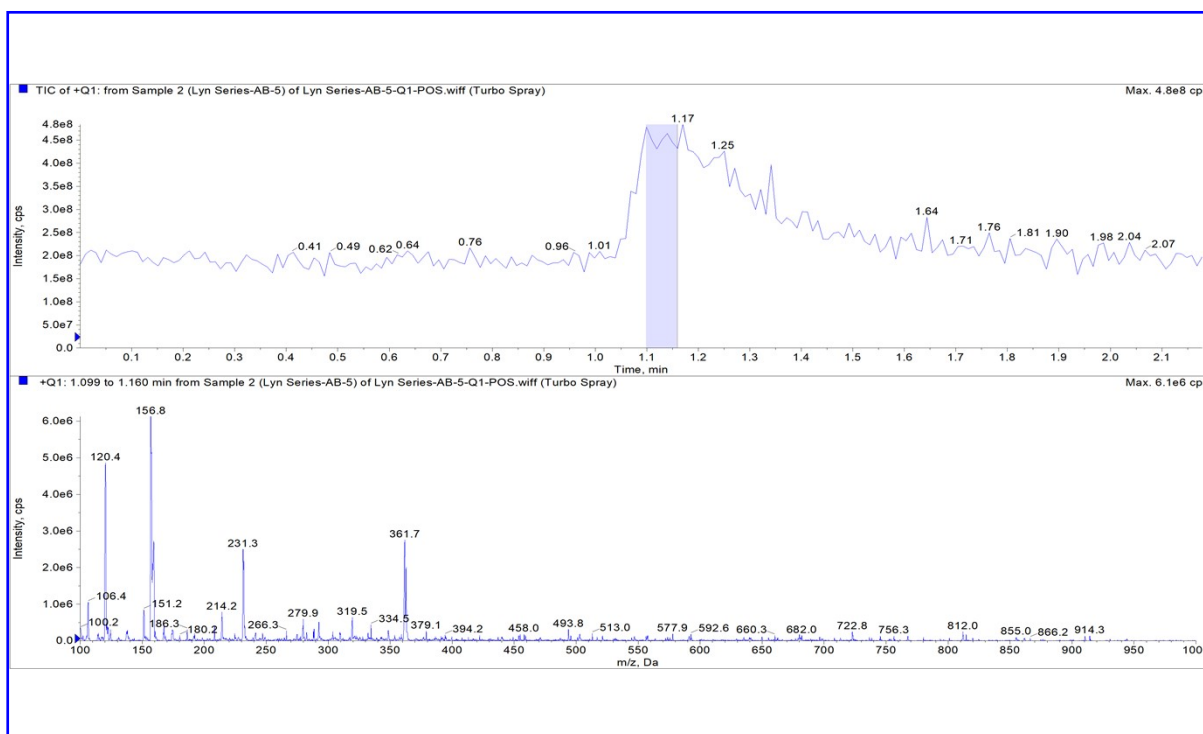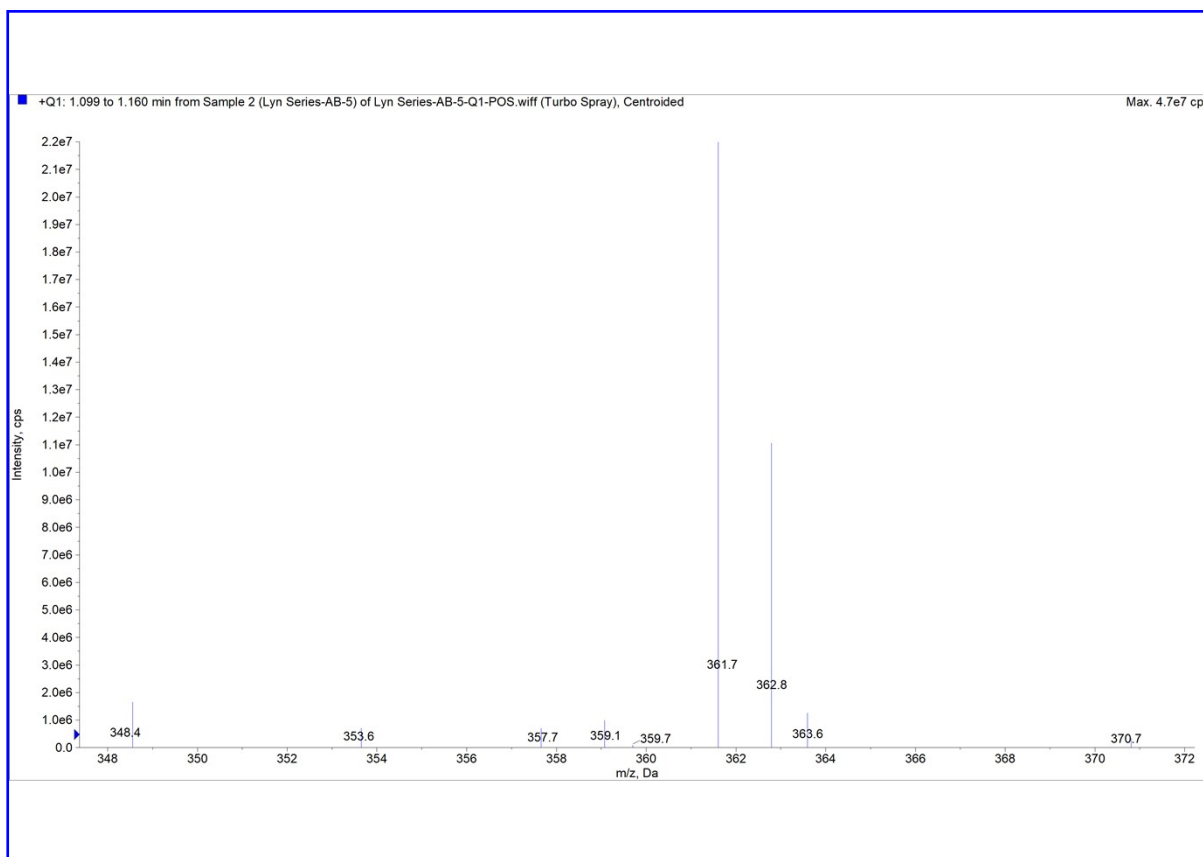



**FTIR of compound 9-(4-methoxyphenyl)acenaphtho[1,2-b]quinoxaline (5e)**

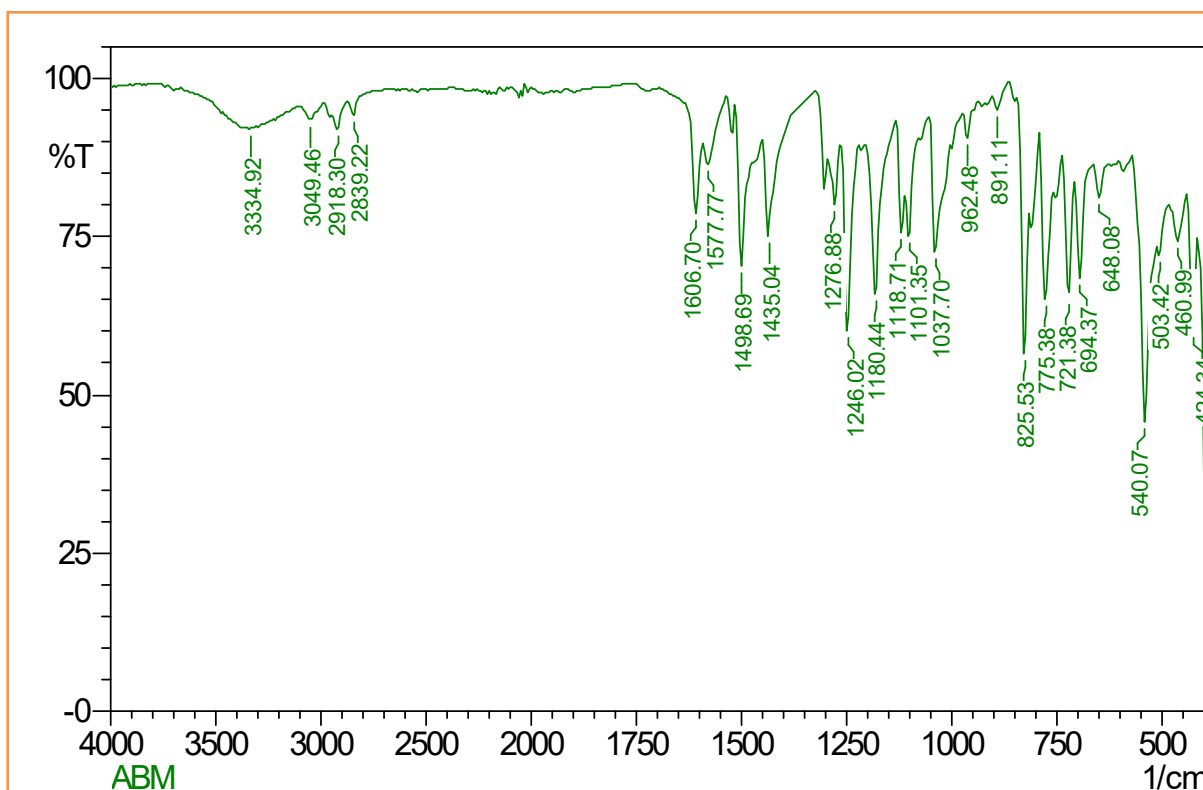

**UPLC purity profile of compound 9-(4-methoxyphenyl)acenaphtho[1,2-b]quinoxaline (5e)**

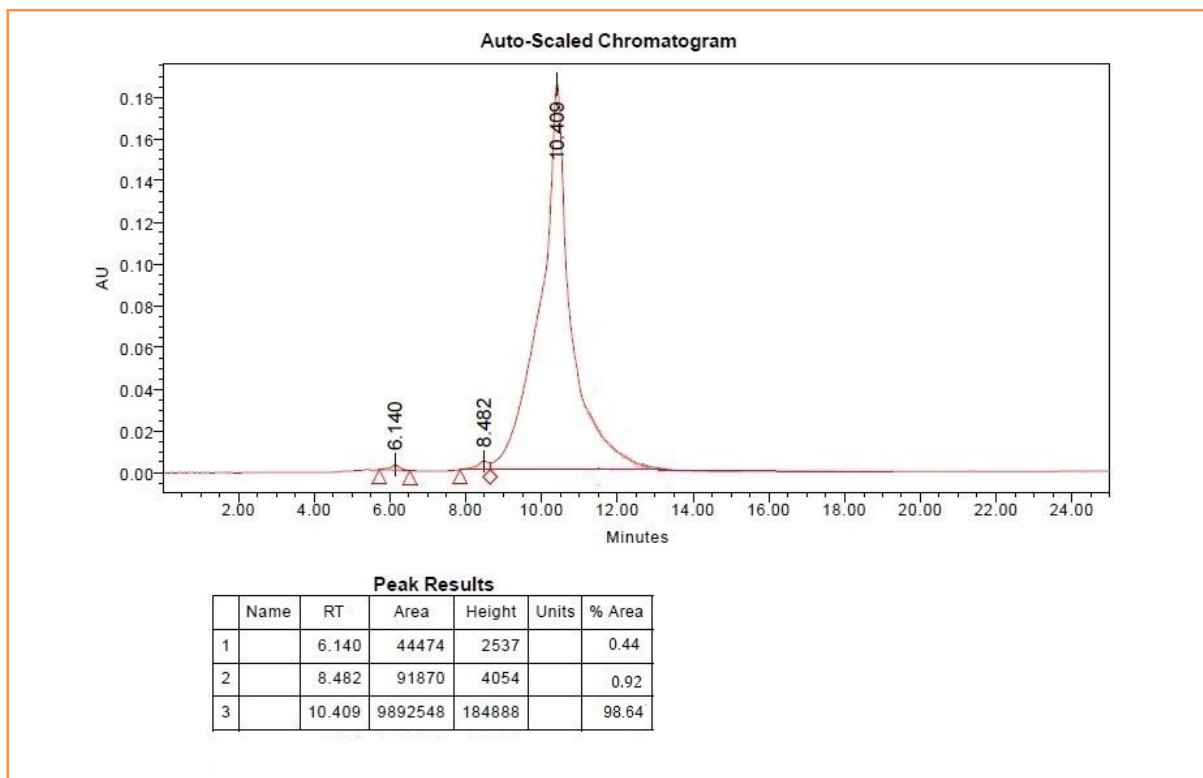

# <sup>1</sup>H NMR of compound 9-(4-(trifluoromethyl)phenyl)acenaphtho[1,2-b]quinoxaline (5f)

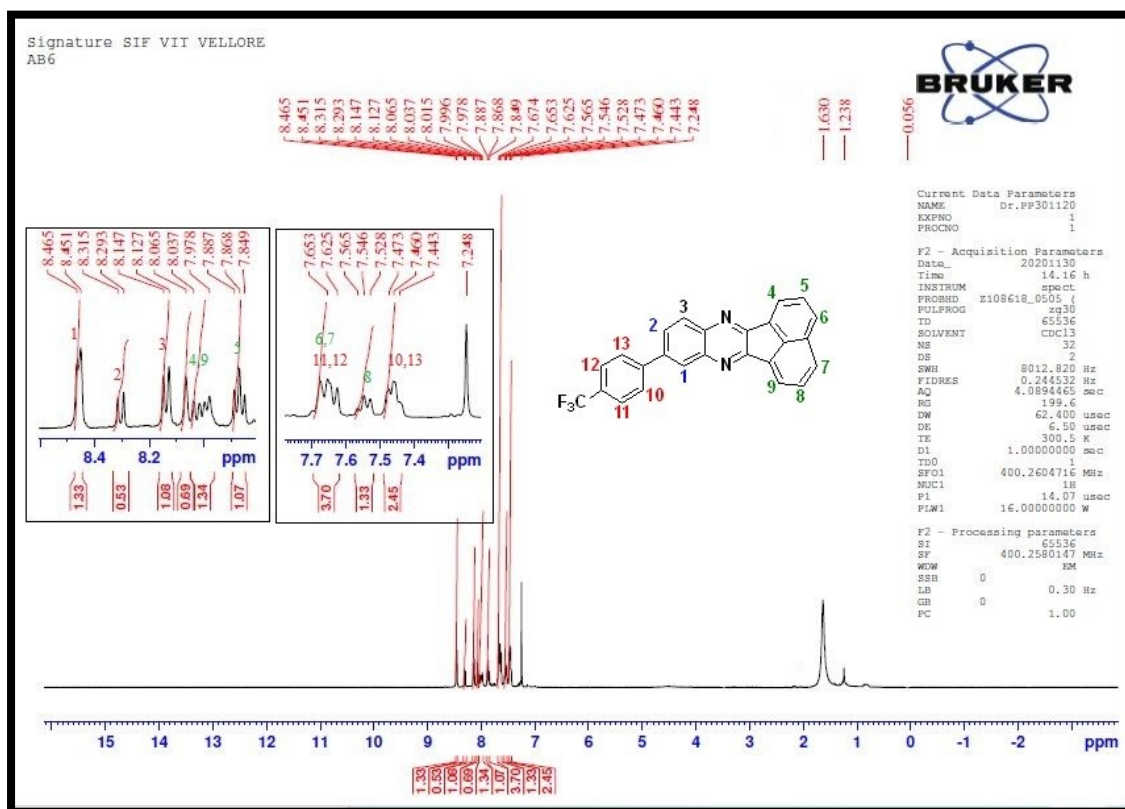

# <sup>13</sup>C NMR of compound 9-(4-(trifluoromethyl)phenyl)acenaphtho[1,2-b]quinoxaline (5f)

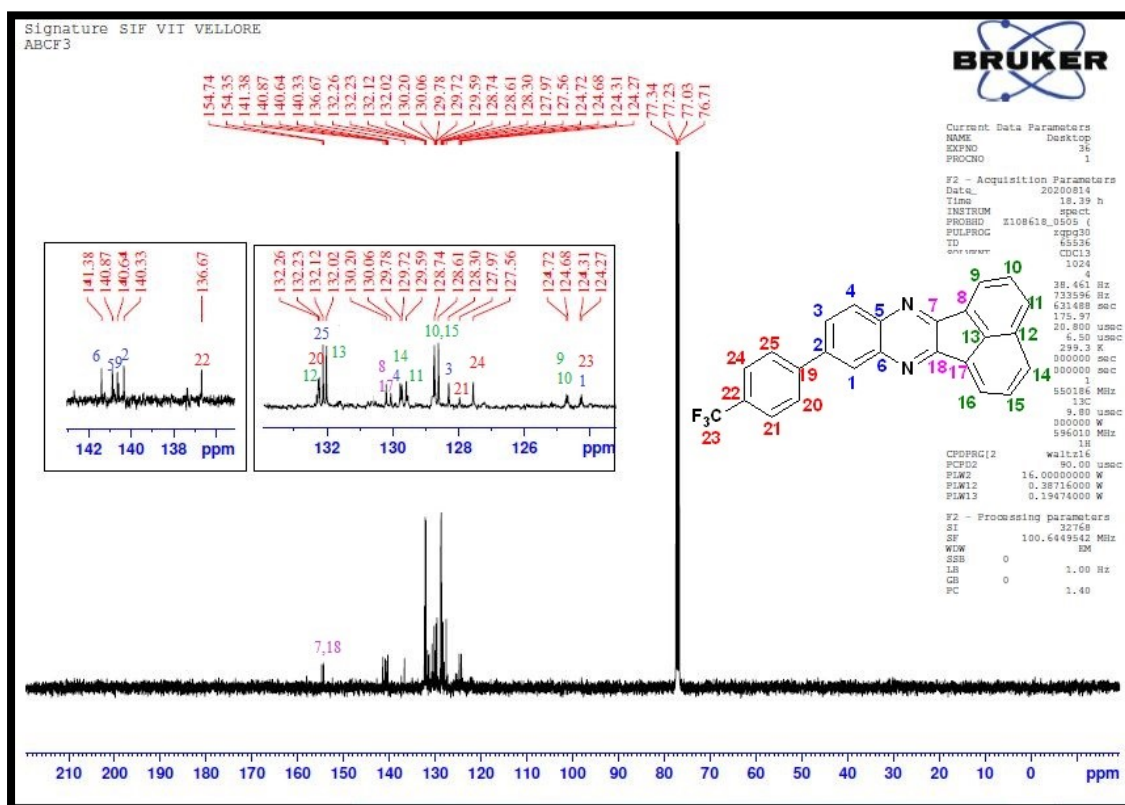

# ESI-MS of compound 9-(4-(trifluoromethyl)phenyl)acenaphtho[1,2-b]quinoxaline (5f)

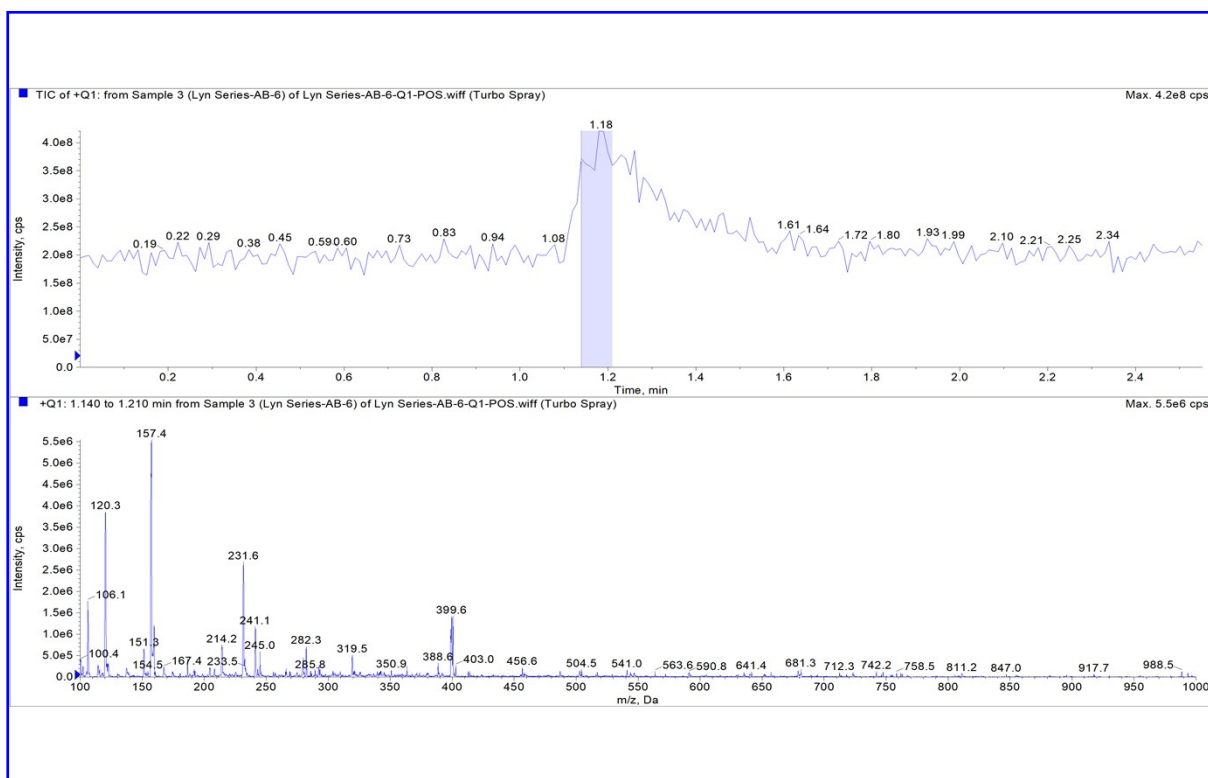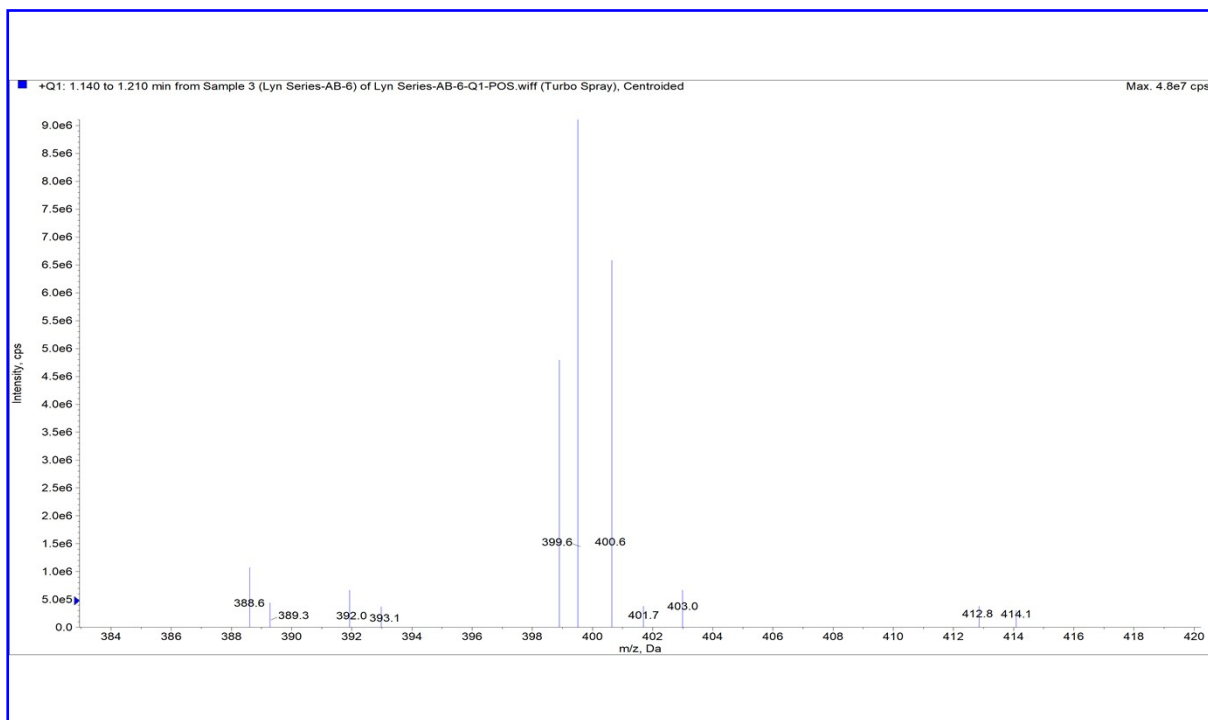

**FTIR of compound 9-(4-(trifluoromethyl)phenyl)acenaphtho[1,2-b]quinoxaline (5f)**

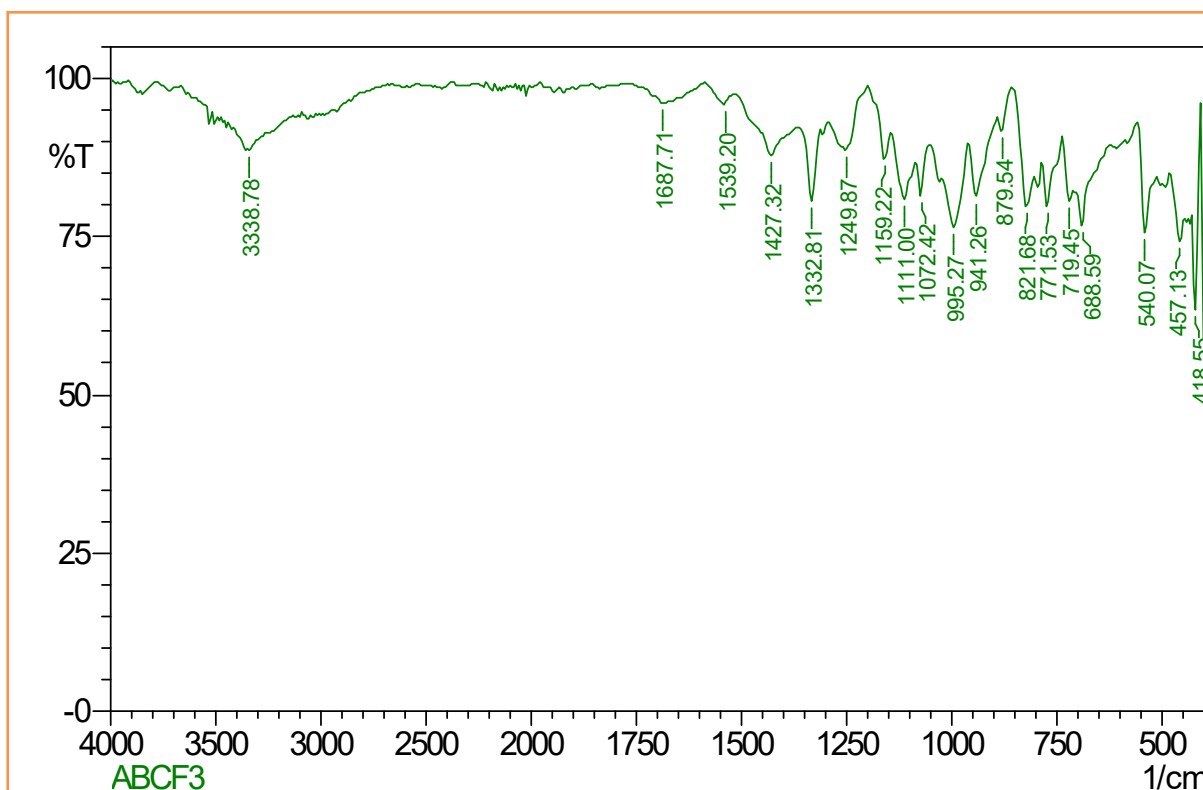

**UPLC purity profile of compound 9-(4-(trifluoromethyl)phenyl)acenaphtho[1,2-b]quinoxaline (5f)**

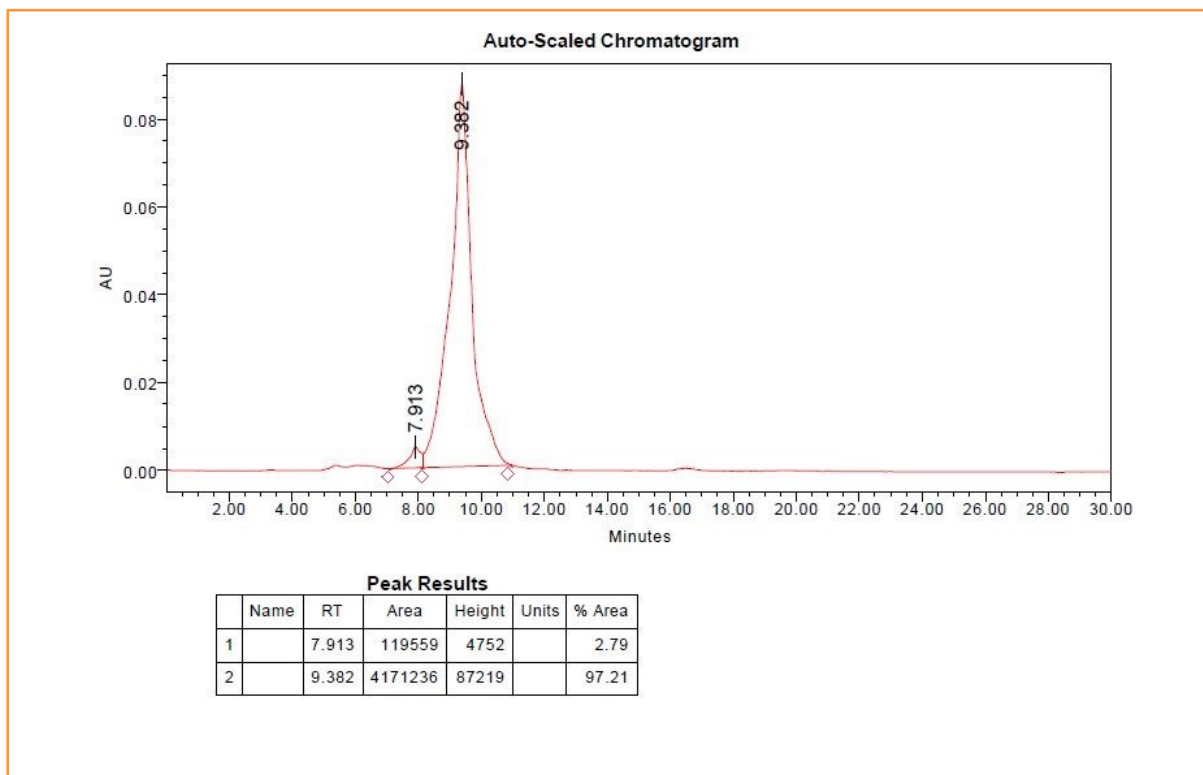

# <sup>1</sup>H NMR of compound 9-(4-chlorophenyl)acenaphtho[1,2-b]quinoxaline (5g)

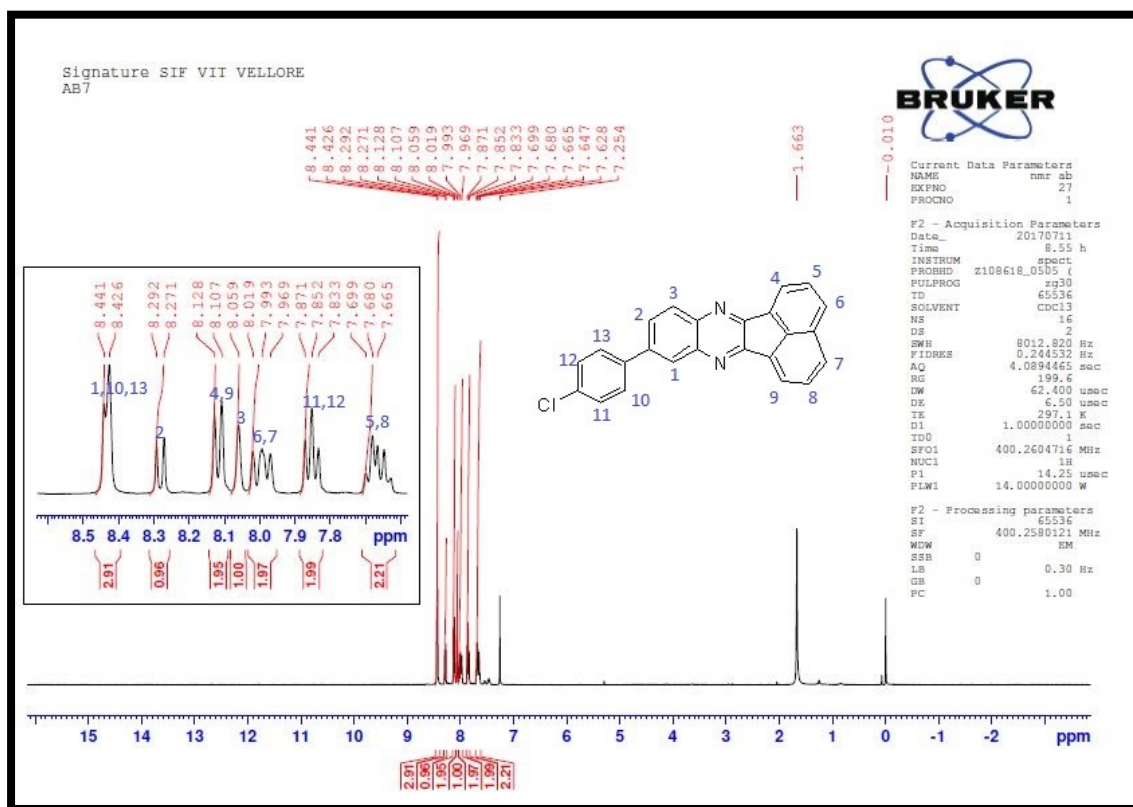

# <sup>13</sup>C NMR spectrum of compound 9-(4-chlorophenyl)acenaphtho[1,2-b]quinoxaline (5g)

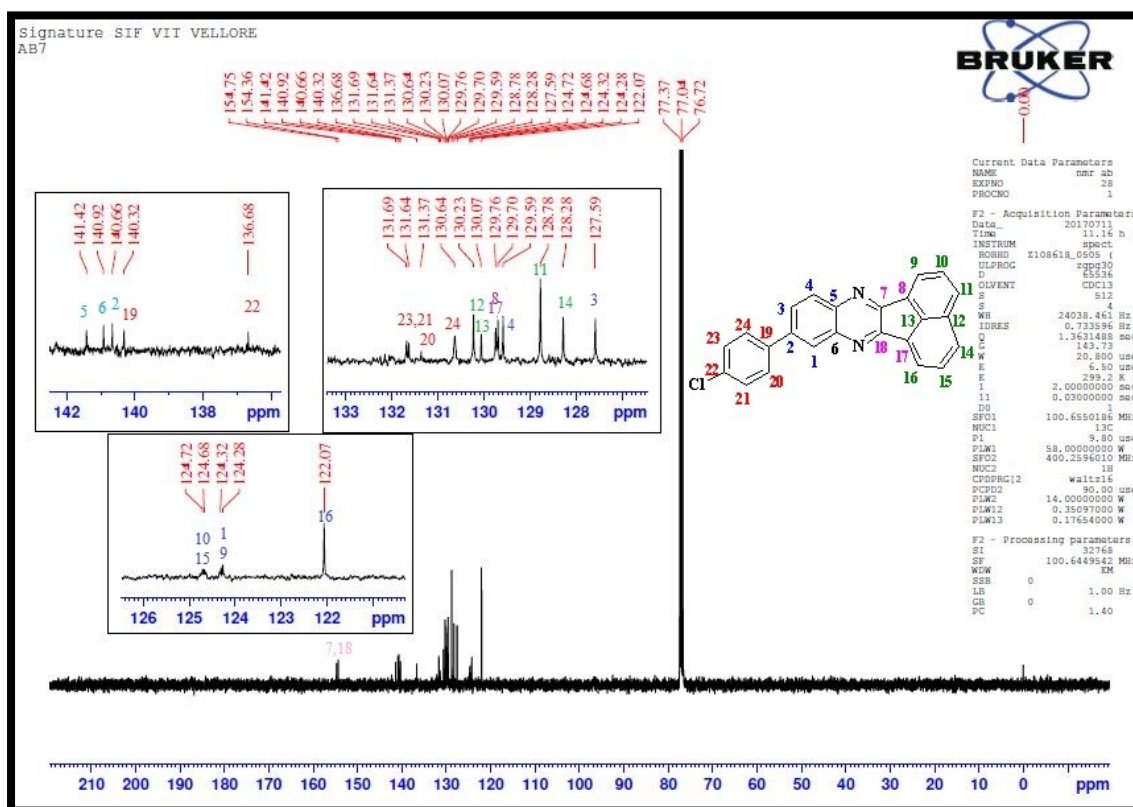

# ESI-MS of compound 9-(4-chlorophenyl)acenaphtho[1,2-b]quinoxaline (5g)

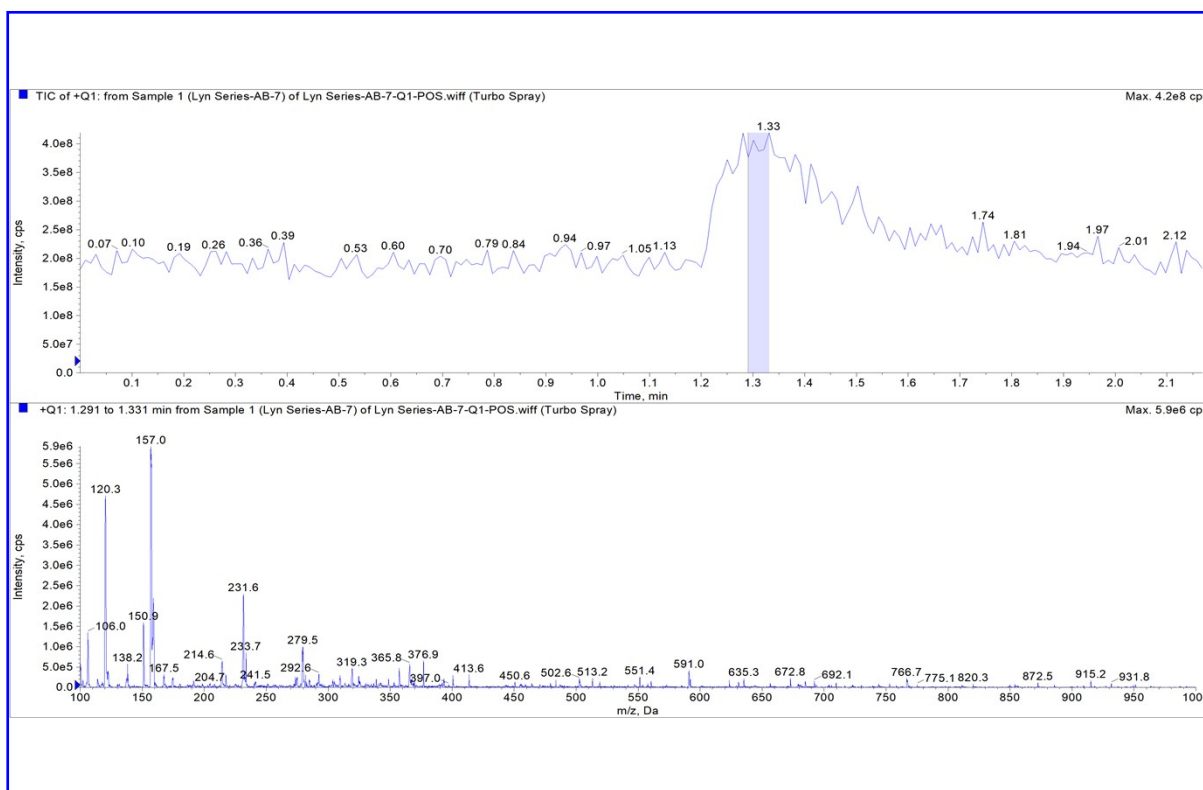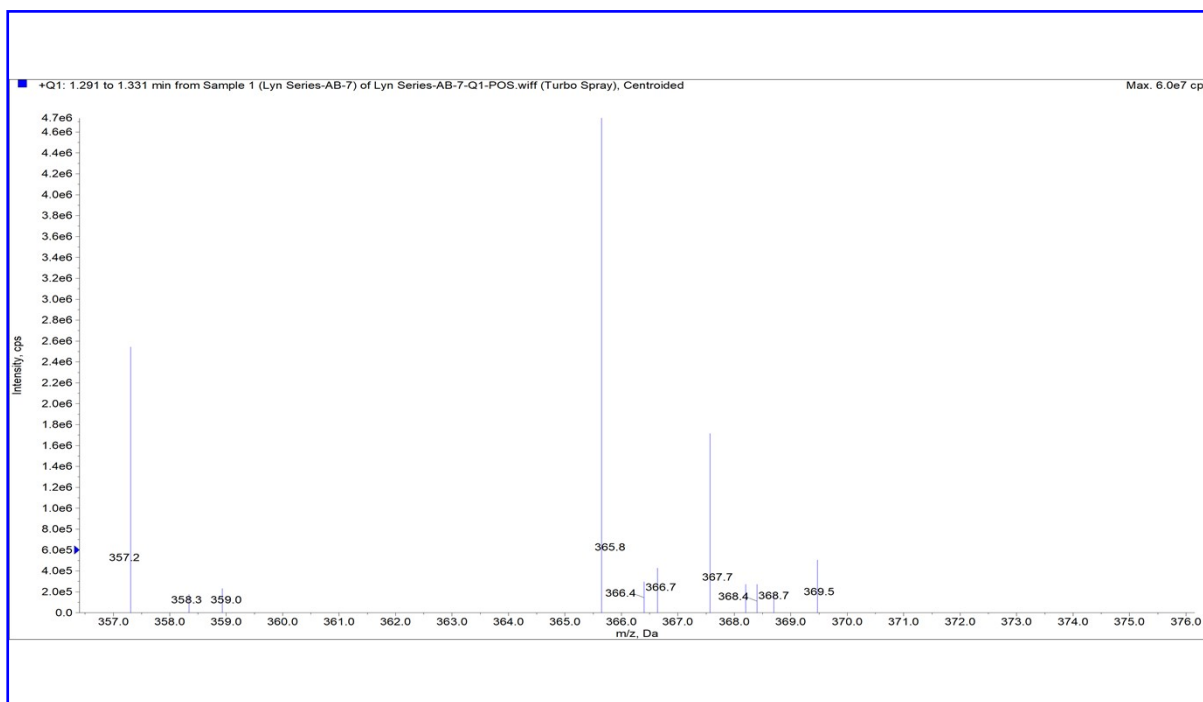

**FTIR of compound 9-(4-chlorophenyl)acenaphtho[1,2-b]quinoxaline (5g)**

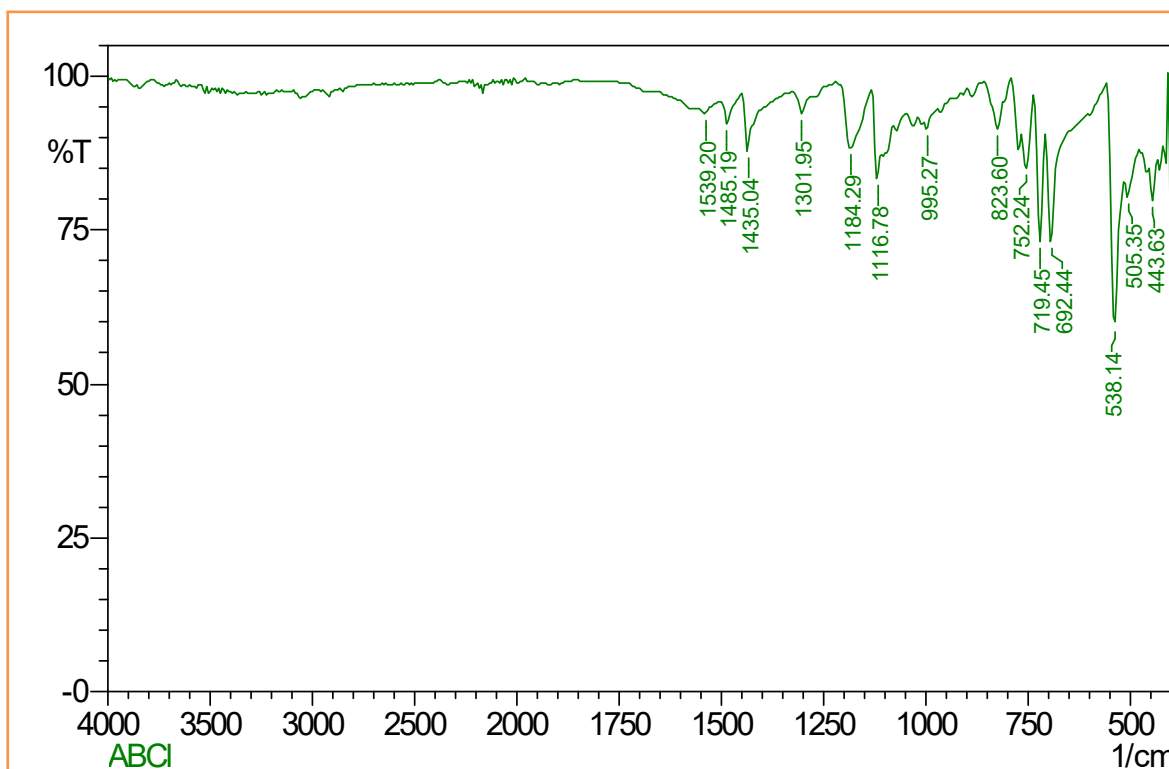

**UPLC purity profile of compound 9-(4-chlorophenyl)acenaphtho[1,2-b]quinoxaline (5g)**

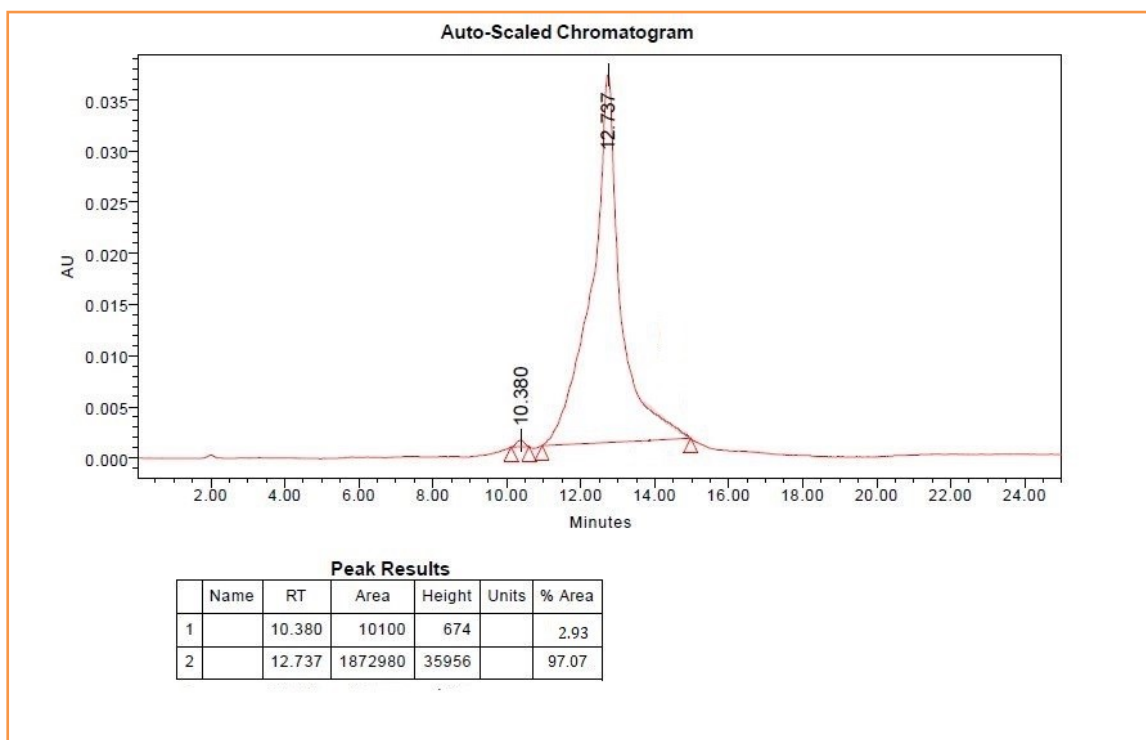

## Cell Viability Plot

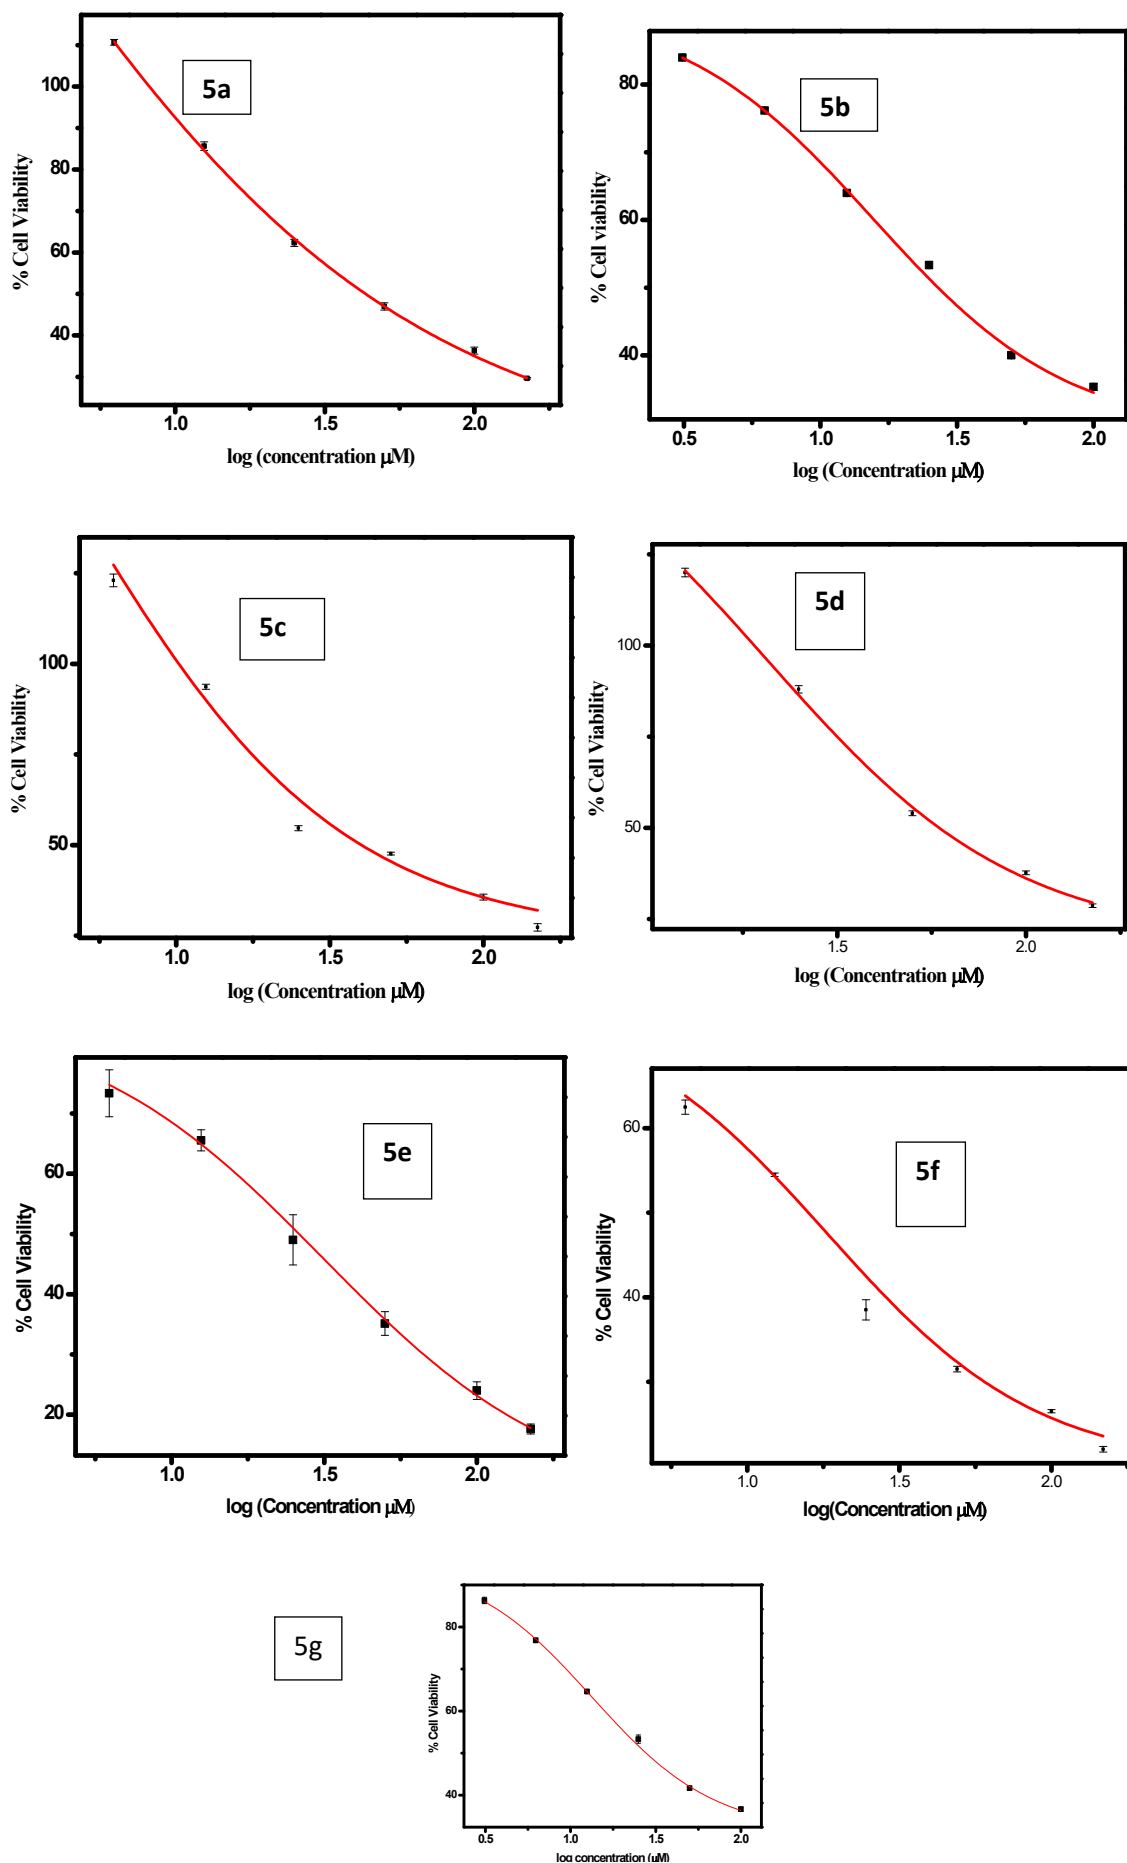

Fig S1: Cell viability vs log[5a-g] plot for HeLa cell line



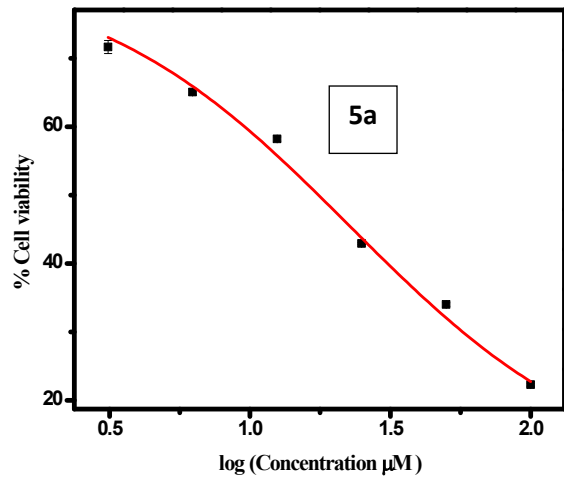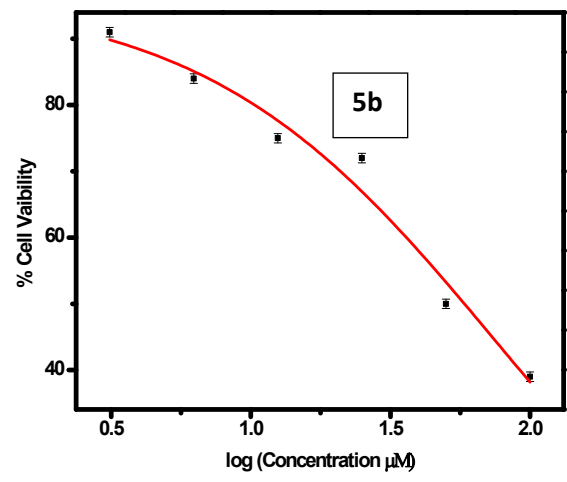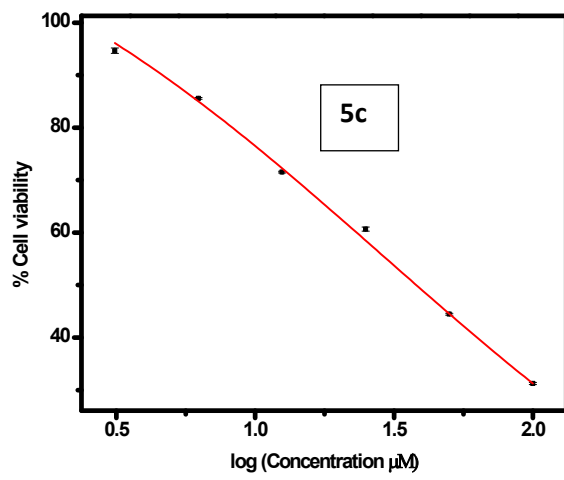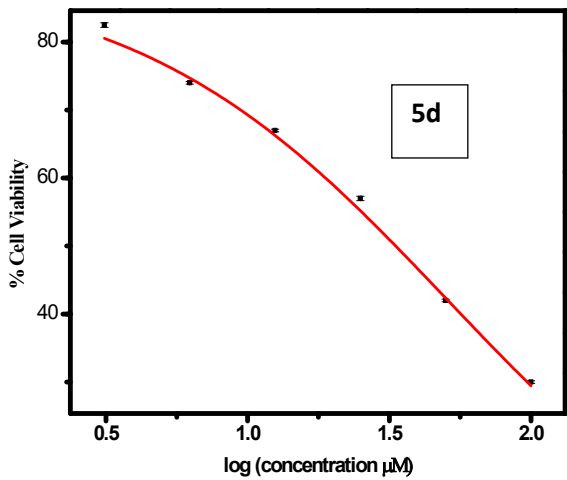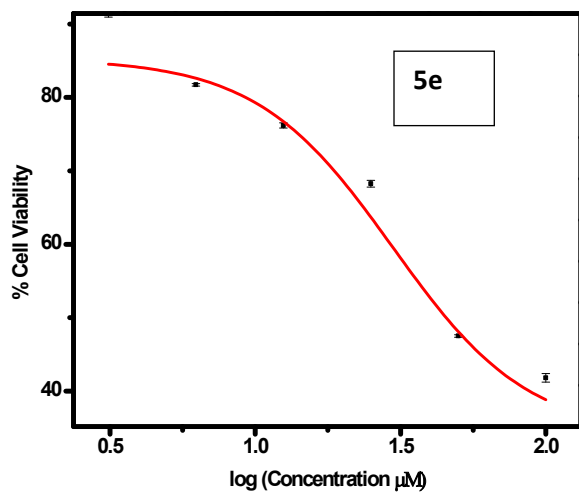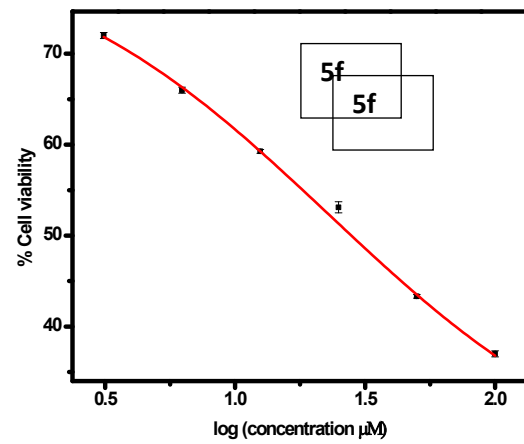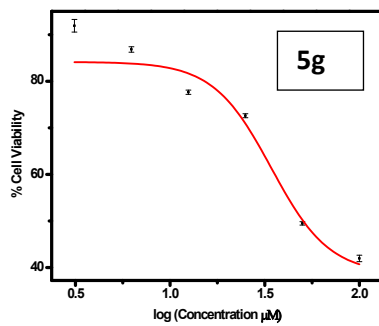

Fig S2: Cell viability vs log[5a-g] plot for U87MG cell line

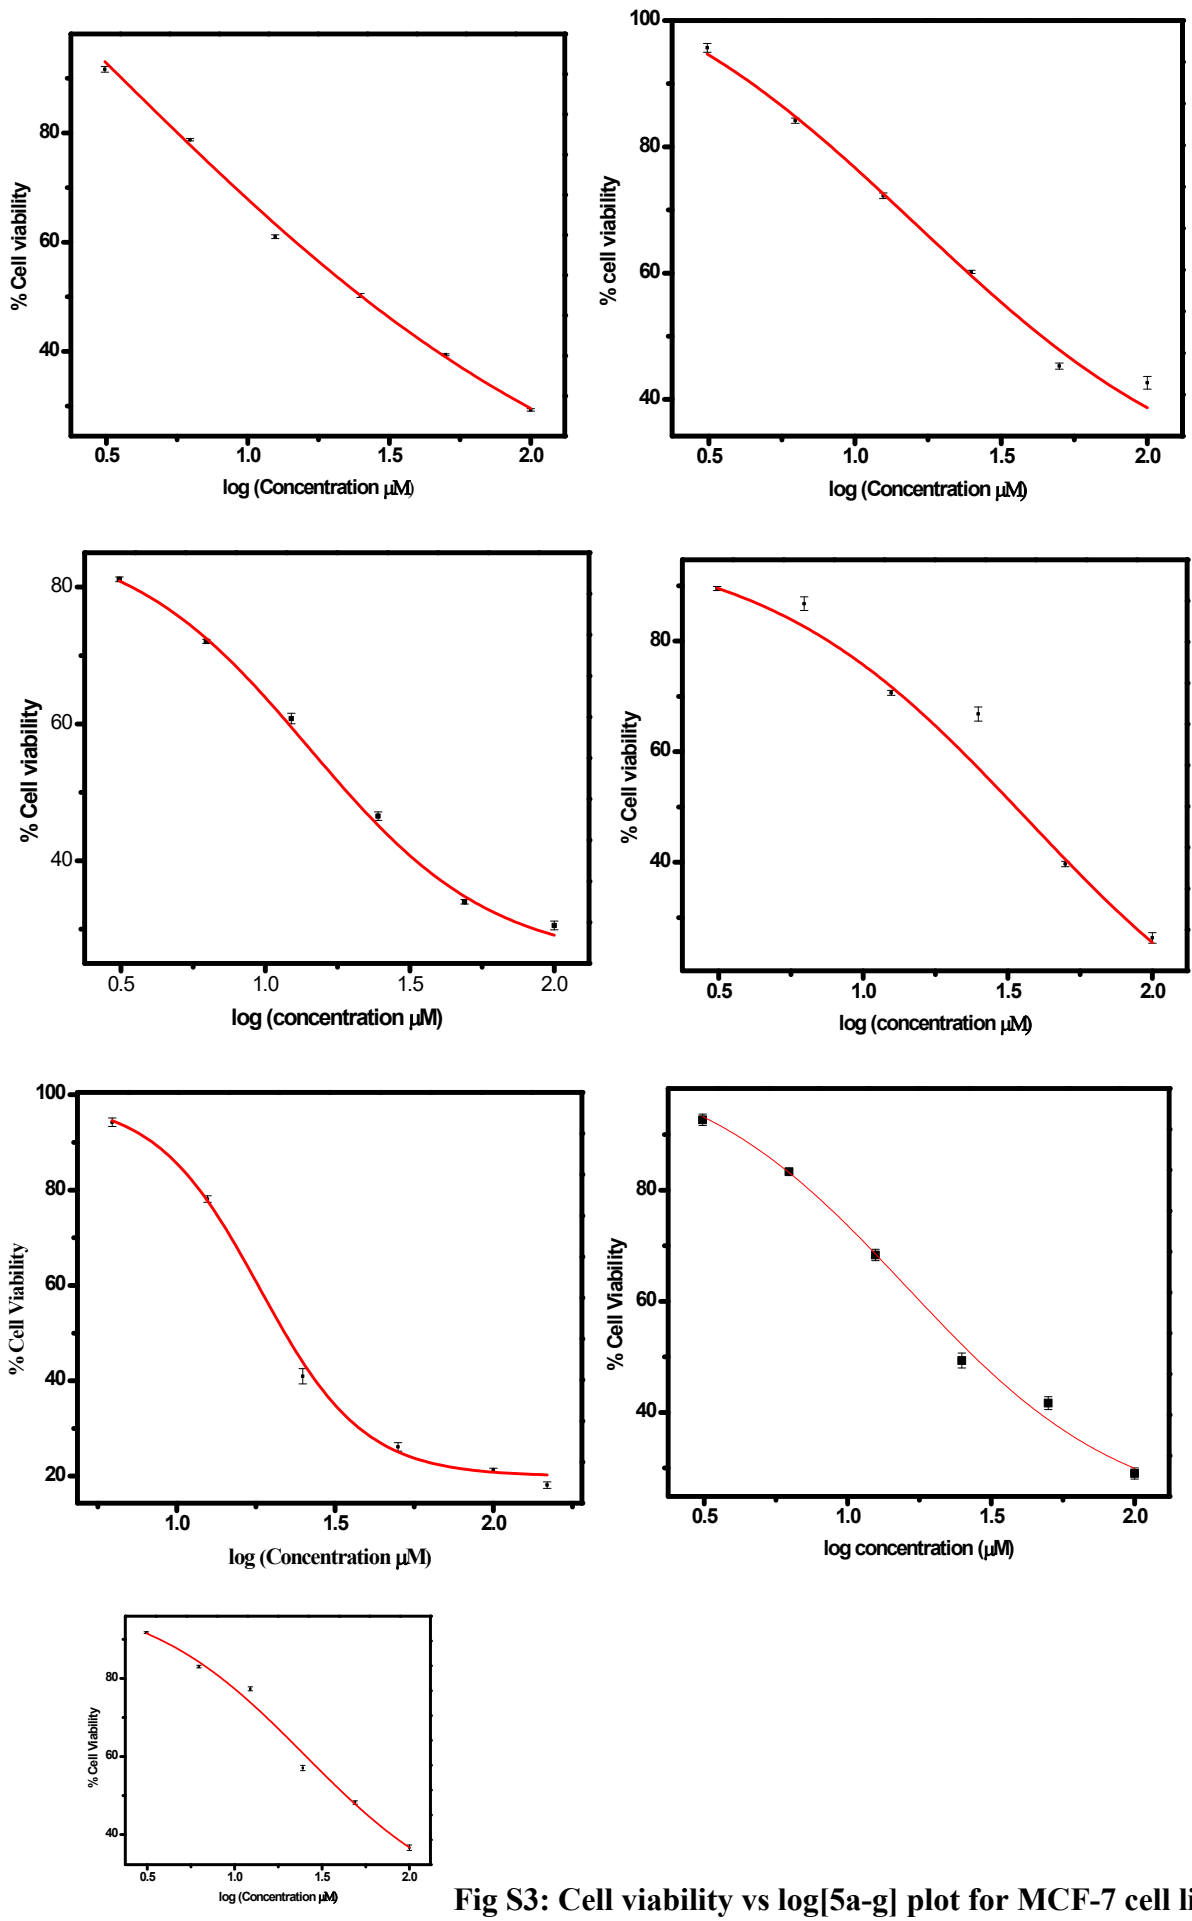

Fig S3: Cell viability vs log[5a-g] plot for MCF-7 cell line

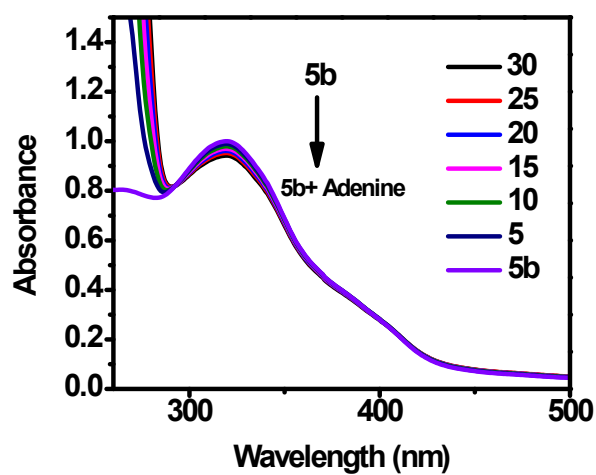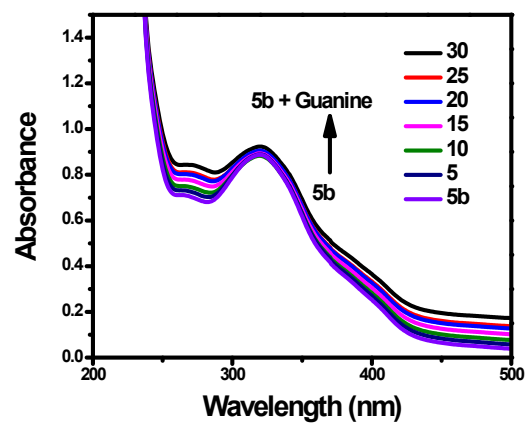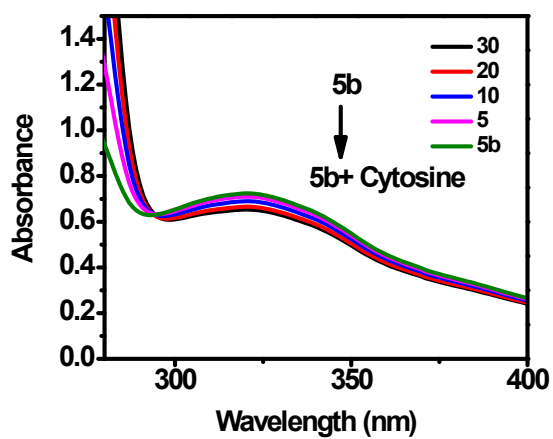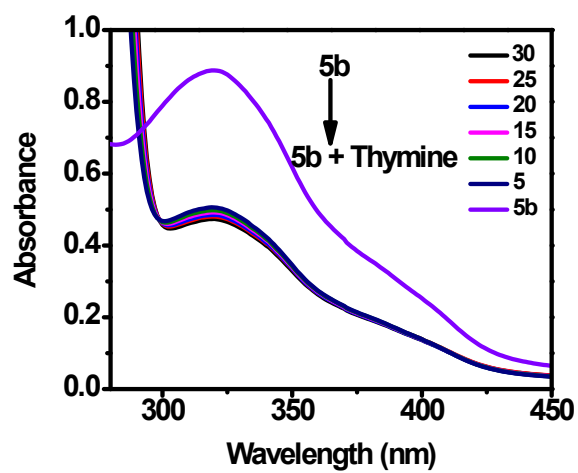

Fig. S4 ATGC titration with compound 5b
